*Review Article*

# The impact of HIV on women living with HIV and their families in low- and middle-income countries: A systematic review

Nelsensius Klau Fauk<sup>1,2</sup>, Lillian Mwanri<sup>1</sup>, Karen Hawke<sup>3</sup>, Leila Mohammadi<sup>4</sup>, Paul Russell Ward<sup>1</sup>

<sup>1</sup> Torrens University Australia, Adelaide, 88 Wakefield St, Adelaide SA 5000, Australia.

<sup>2</sup> Institute of Resource Governance and Social Change, Jl. R. W. Monginsidi II, No. 2, Kupang, Indonesia, 85221.

<sup>3</sup> Aboriginal Communities and Families Research Alliance, South Australian Health and Medical Research Institute, Australia.

<sup>4</sup> College of Medicine and Public Health, Flinders University, GPO Box 2100, Adelaide 5001, Australia.

**Abstract:** HIV infection adds a significant burden to women in low- and middle-income countries (LMICs), often leading to severe detrimental impact, not only on themselves, but also on their families and communities. Given that more than half of all people living with HIV globally are females (53%), this review seeks to understand the impact of HIV infection on women living with HIV (WLHIV) and their families in LMICs, and the interrelationships between one impact and another. A systematic review was conducted to find literature using the following databases: Medline, PsycINFO, CINAL, Emcare, Scopus and ProQuest. Research articles were included if they met the following inclusion criteria: conducted in LMICs, published in English language between January 1<sup>st</sup> 1990 and October 31<sup>st</sup> 2021, had full text available, involved WLHIV (married and unmarried), and focused on the impact of HIV on these women and their families. Critical appraisal tools developed by Joanna Briggs Institute (JBI) were used to assess the methodological quality of the studies and thematic narrative synthesis was used to analyse the findings. A total of 22 articles met the inclusion criteria. The review showed that HIV has a range of negative consequences on WLHIV and their families including: (i) psychological impact, (ii) poor physical health and intimate partner violence, (iii) social impact, and (iv) economic impact. The findings indicate the need for targeted interventions, specific to WLHIV, that address the inequity and discrimination they face. These interventions should also incorporate education and sustainable support structures for WLHIV and their families.

**Keywords:** WLHIV; HIV impact; HIV-affected families; low- and middle-income countries

## 1. Introduction

The Human Immunodeficiency Virus (HIV) and the Acquired Immune Deficiency Syndrome (AIDS) have been a worldwide public health problem for close to four decades (1). The 2020 UNAIDS report shows an estimated 37.7 million people living with HIV (PLHIV) worldwide, 1.7 million new diagnoses and 680,000 AIDS-related deaths in 2020 (1, 2). Globally, 53% of the estimated number of PLHIV are women aged 15 and over (2). In sub-Saharan Africa (SSA) where the majority (70.5%) of PLHIV reside, women living with HIV (WLHIV) represented 63% of HIV infections among adults aged 15 and older (1, 2). The current report also shows an estimated 4200 women aged 15-24 years becoming infected with HIV every week and are twice likely to be living with HIV than men in SSA (2). In 2020 in Asia and the Pacific region, WLHIV aged 15-24 years and 25-49 years represented 11% and 19%, respectively, of the total number of 5.8 million PLHIV (1). Globally, around 5000 women aged 15-24 years become infected with HIV every week (1).

It is known that compared to men or other key-affected populations such as transgender populations and men who have sex with men in low- and middle-income countries (LMICs), women generally face a greater burden of HIV impact (3-9). LMICs are the countries defined by the World

Bank as those with gross national income per capita between \$1,045 or less (low-income), \$1,045 and \$4,095 (lower middle-income) and \$4,096 and \$12,695 (upper middle-income) (10). Previous studies have reported that WLHIV in LMICs experience considerable psychological challenges, including depression, stress, anxiety and fear due to various concerns facing them following the HIV diagnosis (1, 11, 12). WLHIV are also reported to experience a number of social challenges such as stigma and discrimination by others or non-infected people within families, communities, workplaces and healthcare settings, manifesting in various discriminatory and stigmatising attitudes and behaviours (7, 11, 13). A lack of knowledge about how HIV is transmitted and prevented and the fear of contracting HIV through physical, social and healthcare-related contacts have often been reported as the main supporting factors for such stigma and discrimination against WLHIV (14, 15). For example, these lead to WLHIV being negatively labelled, avoided, rejected and excluded by others within families, communities and healthcare settings due to their HIV-positive status (16-18). Receiving a diagnosis and living with HIV also have negative economic consequences on women and their family through several mechanisms, such as women's inability to work due to poor physical health condition, loss of employment leading a reduction in or loss of family incomes, and increased health expenditure (9, 19, 20). Such economic consequences have been reported to also lead to food insecurity within the family of WLHIV, forced sale of family properties including land and houses to cover healthcare and living expenses (9, 19, 21-23). HIV diagnosis among women or mothers also causes negative outcomes for education and wellbeing of their children (19, 24, 25), and child-mother separation or child-parent conflict which can have an extremely detrimental effect on the children's mental health (20, 25).

Despite previous studies reporting how HIV affects the lives of PLHIV, to date, there have been no published systematic reviews, which examine the impact HIV has on WLHIV and their families in LMICs. This study aims to improve our understanding of HIV impact on WLHIV and their families, the mechanisms through which HIV impact influences their lives and interrelationships between one impact and another. It is also crucial to gain greater understanding of the consequences of an HIV diagnosis for women and their families, and identify the drivers behind these consequences given the high burden of disease among WLHIV. Understanding and identifying HIV impact will support further research and advocacy around education, targeted evidence-based interventions, and healthcare systems that address the specific needs of WLHIV and their families.

## 2. Methods

### 2.1. *The systematic search of literature*

We performed an initial search of relevant key terms guided by the PICO (Population, Intervention, Comparison and Outcomes), a framework that has been used to inform evidence based practice (26). The main search was then drafted and refined in Medline using both Medical Subject Headings (MeSH) terms and keywords as described in the inclusion criteria section below. We then translated the search into multiple databases, including Medline, PsycINFO, CINAL, Emtree, Scopus and ProQuest.

### 2.2. *Inclusion criteria*

Studies were included if they: (i) were published in English and between Jan 1, 1990 and Oct 31, 2021 inclusive to capture evidence on the impact of HIV on women which seemed to emerge in 1990s (Appendix 1); (ii) were conducted in LMICs (based on the classification made by the World Bank); (iii) involved WLHIV (married and unmarried); and (iv) aimed to identify psycho-social, physical, health, economic and educational impact of HIV on WLHIV and their families (Figure 1). The keywords were used in combination using Boolean operator system including AND and OR. An example of full electronic search strategy in SCOPUS is presented below and the full key words or search strategy in all databases can be found in Appendix 1.

```
TITLE-ABS-KEY((HIV* or "Human immunodeficiency virus" or AIDS)) AND TITLE-ABS-KEY((Wives or Wife or Mothers or female* or girl* or women or woman)) AND TITLE-ABS-KEY((predictor* or "risk factor*" or determinant* or "sexual behaviour" or "multiple sex partner*" or extramarital* or "sell* sex*" or "transactional sex" or prostitut* or "sex work" or
```

condom\* or "unsafe sex" or "unprotected sex" or knowledge or "social influenc\*" or "peer influenc\*" or "social norm\*" or cultur\* or sociocultural\* or socioeconomic\* or "social environmental\*" or socioenvironment\* or stigma or discriminat\* or "psychological impact" or "social impact" or education or "school attendance" or "withdraw\* from school" or stress or distress or depression or "psychosocial impact" or employment or "loss of job" or income or "nutrition security" or "food insecurity" or health or "physical health" or wellbeing or "healthcare accessibility\*" or absenteeism or religio\* or consequence\*)) AND TITLE-ABS-KEY(((family\* or families)) AND TITLE-ABS-KEY(((Developing or "Less developed" or "low resource\*" or disadvantaged or "resource limited" or poor or "low\* or middle income\*") W/O (countri\* or region\* or nation? or area\*))))

### 2.3. Selection of the studies and methodological quality assessment

3,371 articles retrieved from the databases and eight from google through manual search were collated and imported into Endnote software (27). After removing 1,040 duplicates, 2,339 titles and abstracts were screened by two assessors (NKF and LM), further removing 2,217 articles not meeting the inclusion criteria. The assessment of full texts of remaining 122 articles led to a further removal of 101 articles not meeting including criteria and one article not meeting methodological quality. The reference listing of the 20 articles was scrutinised and two additional articles were obtained. The full texts of these two articles were also assessed to determine their eligibility. Twenty-two articles fulfilling the inclusion criteria and the methodological quality, were finally included in this review (Figure 1). The assessment for methodological quality was performed using critical appraisal tools developed by Joanna Briggs Institute (JBI) for study design (28). The methodological quality assessment was performed by two assessors (NKF and LM), and any disagreement between them was resolved through discussion. The appraisal forms for qualitative, cohort, cross sectional and case report studies comprised ten, nine, eight and eight questions respectively (Appendix 2). The questions were about the quality of the studies, for which each question received a response of Yes, No, Unclear, and Not Applicable.

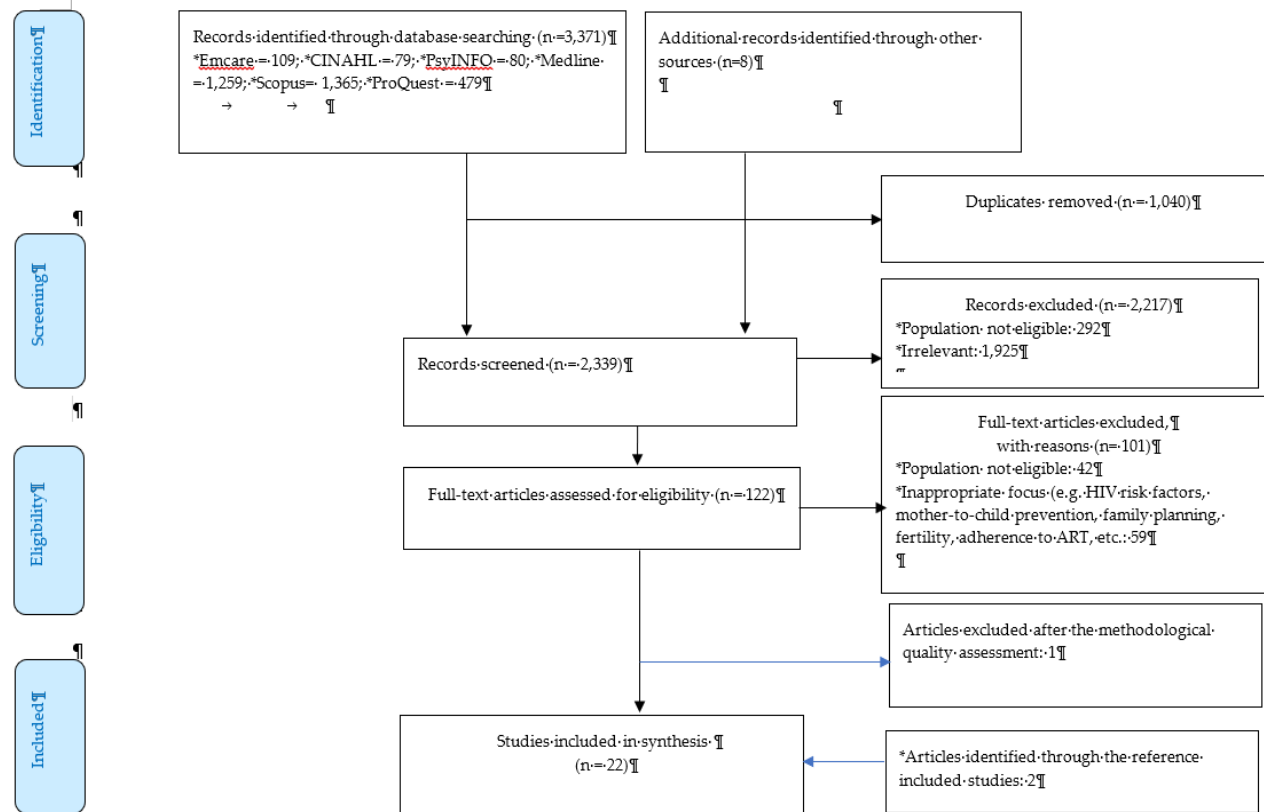

**Figure 1.** PRISMA Flow diagram of systematic literature search: records identified, screened, eligible and included in the review.

#### 2.4. Data extraction and analysis

Guided by the Thomas and Harden’s framework (29), a thematic analysis of selected articles was systematically performed as follows: (i) conducting a line by line open coding, with one assessor (NKF) extracting free codes from the findings of each article, (ii) developing descriptive themes where the free codes with similarity were organised or grouped together, (iii) reviewing (second assessor LM) of the initial descriptive themes, and thoroughly discussing (by both assessors – NKF and LM) any discrepancies, and (iv) finalising the review of descriptive themes and subthemes, with both assessors deciding the final analytical themes for the current study (29). The final version was agreed by all authors following further refinement of the theme and subtheme headings.

### 3. Results

#### 3.1. Description of the included studies

Table 1 summarises the descriptive characteristics of the 22 included articles. Of the 22 articles, 12 studies (13 articles) were conducted in Asia and the Pacific region (6-9, 11, 16, 20, 30-35), six in Africa (5, 12, 13, 36-38) and one study (two articles) in the Caribbean (19, 25). One study (39) collected data from participants in Zimbabwe and the USA and presented the results of these two groups separately. For the purpose of this review, only the study results about the participants in Zimbabwe were included, as this fits the inclusion criteria. Of the 22 articles, thirteen were qualitative studies collecting data through one-on-one interviews (5, 6, 9, 12, 16, 19, 25, 31-35, 37). Nine articles used quantitative methods (7, 8, 11, 13, 20, 30, 36, 38, 39), of which seven were cross-sectional (7, 8, 11, 13, 36, 38, 39) and two were prospective cohort studies (20, 30). A total of 2,444 WLHIV participated in these studies, of whom 190 and 2,254 respectively were involved in qualitative and quantitative studies. Several studies involved a combination of WLHIV and children (25, 39), HIV negative women or women with unknown HIV status (13) and HIV positive men (8, 33), however only the results about WLHIV or the views of WLHIV were included in this review (Table 1). The sample sizes or the number of WLHIV who participated in the qualitative and quantitative studies reviewed varied from 1 to 30, and 50 to 633 people, respectively. The participants were recruited using convenient, purposive or snowball sampling techniques. Eight studies involved only married women (7, 9, 11-13, 20, 30, 34), nine involved a combination of married, widowed and single women (6, 8, 16, 31, 32, 36-39) and one study involved single women (33). Four studies did not report marital status of the participants (5, 19, 25, 35). Participants’ age ranged from 15 to 58 years old, however, three studies did not report participants’ age (8, 19, 25). The qualitative studies used content analysis (5, 12, 31, 32, 35) and thematic analysis (6, 16, 19, 25, 33, 34, 37) approach for data analysis, however one study employed a combination of thematic analysis, analysis of episode and identification of paradigm cases (9). The majority of the quantitative studies used one or a combination of bivariate and multivariate linear or logistic regression models for data analysis (7, 11, 13, 30, 36, 38, 39).

**Table 1.** Description of the included studies in alphabetical order.

| Author/Year                | Study location | Study design/study aim                                                                                                    | Number of participants/ type of participants                                                                                                                                              | Analysis         | Main themes of the impact HIV on WLHIV and their families                                                                                                                                                                                                                       |
|----------------------------|----------------|---------------------------------------------------------------------------------------------------------------------------|-------------------------------------------------------------------------------------------------------------------------------------------------------------------------------------------|------------------|---------------------------------------------------------------------------------------------------------------------------------------------------------------------------------------------------------------------------------------------------------------------------------|
| 1. Ashaba et al., 2017 (5) | Uganda         | - Qualitative design<br>- Methods:<br>• In-depth interview<br>- Aim:<br>• To explore experiences of depression among WLWH | - 20 postpartum WLHIV<br>- Marital status:<br>• Not reported<br>- Participants’ age:<br>• Median age: 33 years<br>• Inter-Quartile range (IQR): 28-35 years.<br>- Participant recruitment | Content analysis | <i>The impact of HIV on WLHIV</i><br>(i) External stigma and discrimination<br>• From healthcare professionals<br>• From community members<br>(ii) Intimate partner violence<br>(iii) Psychological impacts<br>• Distress and fear of maternal and children’s health and future |

|                                |                            |                                                                                                                                                                                                                                                                                                                                                                                |                                                                                                                                                                                                                                                                                                                                                                                                                                                                                                                                                                                                                                                                                        |                                                                                               |                                                                                                                                                                                                                                                                                                                                                                                                                                                                                                                                                                                                                                                                                                                |
|--------------------------------|----------------------------|--------------------------------------------------------------------------------------------------------------------------------------------------------------------------------------------------------------------------------------------------------------------------------------------------------------------------------------------------------------------------------|----------------------------------------------------------------------------------------------------------------------------------------------------------------------------------------------------------------------------------------------------------------------------------------------------------------------------------------------------------------------------------------------------------------------------------------------------------------------------------------------------------------------------------------------------------------------------------------------------------------------------------------------------------------------------------------|-----------------------------------------------------------------------------------------------|----------------------------------------------------------------------------------------------------------------------------------------------------------------------------------------------------------------------------------------------------------------------------------------------------------------------------------------------------------------------------------------------------------------------------------------------------------------------------------------------------------------------------------------------------------------------------------------------------------------------------------------------------------------------------------------------------------------|
|                                |                            | during pregnancy technique:<br>and postpartum.                                                                                                                                                                                                                                                                                                                                 | <ul style="list-style-type: none"> <li>Purposive sampling technique</li> </ul>                                                                                                                                                                                                                                                                                                                                                                                                                                                                                                                                                                                                         |                                                                                               |                                                                                                                                                                                                                                                                                                                                                                                                                                                                                                                                                                                                                                                                                                                |
| 2. Azhar, 2018 (16)            | India                      | <ul style="list-style-type: none"> <li>Qualitative design</li> <li>Methods: <ul style="list-style-type: none"> <li>In-depth interview</li> </ul> </li> <li>Aim <ul style="list-style-type: none"> <li>To explore how stigma, social isolation, and depression affect cisgender women living with HIV in Hyderabad, India</li> </ul> </li> </ul>                                | <ul style="list-style-type: none"> <li>16 WLHIV</li> <li>Marital status: <ul style="list-style-type: none"> <li>Majority: widowed</li> <li>Some: married</li> </ul> </li> <li>Participants' age: <ul style="list-style-type: none"> <li>Between 18 to 50 years old</li> <li>Mean age: 37.25 years</li> </ul> </li> <li>Participants were recruited using purposive and snowball sampling techniques</li> </ul>                                                                                                                                                                                                                                                                         | Thematic analysis                                                                             | <p><i>The impact of HIV on WLHIV</i></p> <ul style="list-style-type: none"> <li>(i) Social isolation by family members</li> <li>(ii) External stigma and discrimination <ul style="list-style-type: none"> <li>From family members</li> <li>From healthcare professionals</li> </ul> </li> <li>(iii) Perceived stigma <ul style="list-style-type: none"> <li>The belief about negative attitudes and behaviour of non-infected people towards PLHIV</li> </ul> </li> <li>(iv) Psychological impact <ul style="list-style-type: none"> <li>Feeling sad and bad due to contracting HIV</li> <li>Feeling embarrassed due to changes in physical appearance</li> <li>Fear of discrimination</li> </ul> </li> </ul> |
| 3. Bauman, et al., 2006 (39)   | Zimbabwe and New York, USA | <ul style="list-style-type: none"> <li>Quantitative design: <ul style="list-style-type: none"> <li>Cross-sectional study</li> </ul> </li> <li>Aim <ul style="list-style-type: none"> <li>To measure personal assistive care the child provided; other household responsibilities; hours/day children spent on chores; and parental/child mental health.</li> </ul> </li> </ul> | <ul style="list-style-type: none"> <li>50 WLHIV and 50 children (one child per mother)</li> <li>Marital status of the mothers: <ul style="list-style-type: none"> <li>88% of mothers in Zimbabwe were single mothers (mostly widowed)</li> </ul> </li> <li>Participants' age: <ul style="list-style-type: none"> <li>Children were 8 to 16 years of age</li> <li>Median age of children in Zimbabwe: 12.4</li> <li>Mean age of mothers in Zimbabwe: 38</li> </ul> </li> <li>Participant recruitment technique: <ul style="list-style-type: none"> <li>Participants were recruited through FACT, a community-based AIDS counselling and educational organization</li> </ul> </li> </ul> | $\chi^2$ tests; <i>t</i> -tests; Pearson correlation; and both linear and logistic regression | <p><i>The impact of HIV on families of WLHIV</i></p> <ul style="list-style-type: none"> <li>(i) Social impact on children <ul style="list-style-type: none"> <li>Children took too much responsibility for household chores</li> <li>Inability to participate in after-school activities</li> <li>Inability to do homework at least once in a while</li> <li>Missing socializing with friends</li> </ul> </li> <li>(ii) Child-parent relationship conflict</li> </ul>                                                                                                                                                                                                                                          |
| 4. Bennetts, et al., 1999 (30) | Thailand                   | <ul style="list-style-type: none"> <li>Quantitative design: <ul style="list-style-type: none"> <li>Prospective cohort study</li> </ul> </li> <li>Aim: <ul style="list-style-type: none"> <li>To assess the impact of HIV on the family.</li> </ul> </li> </ul>                                                                                                                 | <ul style="list-style-type: none"> <li>129 postpartum WLHIV</li> <li>Marital status: <ul style="list-style-type: none"> <li>Married</li> </ul> </li> <li>Participants' age: <ul style="list-style-type: none"> <li>33% of the women were less than 20 years of age</li> </ul> </li> <li>Participant recruitment technique: <ul style="list-style-type: none"> <li>Participants were recruited using convenient sampling technique</li> <li>Participants were part</li> </ul> </li> </ul>                                                                                                                                                                                               | Multivariate logistic regression analysis                                                     | <p><i>The impact of HIV on WLHIV</i></p> <ul style="list-style-type: none"> <li>(i) Psychological impact <ul style="list-style-type: none"> <li>Depression</li> <li>Worry</li> <li>Sociodemographic and health-related factors associated with depression and worry: <ul style="list-style-type: none"> <li>Factors associated with depression: advanced stage of HIV disease, a reduction in family income, no longer in a relationship with their partner and those who reported their husbands to be deceased or in</li> </ul> </li> </ul> </li> </ul>                                                                                                                                                      |

|                             |              |                                                                                                                                                                                                                                                                                                                                    |                                                                                                                                                                                                                                                                                                                                                                                                                                                                                                                    |                                                                                                                                                                                                                                                                                                                                      |
|-----------------------------|--------------|------------------------------------------------------------------------------------------------------------------------------------------------------------------------------------------------------------------------------------------------------------------------------------------------------------------------------------|--------------------------------------------------------------------------------------------------------------------------------------------------------------------------------------------------------------------------------------------------------------------------------------------------------------------------------------------------------------------------------------------------------------------------------------------------------------------------------------------------------------------|--------------------------------------------------------------------------------------------------------------------------------------------------------------------------------------------------------------------------------------------------------------------------------------------------------------------------------------|
|                             |              | of a prospective cohort study of mother-to-child transmission among 295 HIV-infected pregnant women and their newborn children                                                                                                                                                                                                     |                                                                                                                                                                                                                                                                                                                                                                                                                                                                                                                    | poor health                                                                                                                                                                                                                                                                                                                          |
|                             |              |                                                                                                                                                                                                                                                                                                                                    |                                                                                                                                                                                                                                                                                                                                                                                                                                                                                                                    | <ul style="list-style-type: none"> <li>Factors associated with worry: lower education attainment, primary caretaker for children, HIV infection status of the child, having HIV-infected children, not yet disclose to HIV status to others, and the feeling that HIV status is something that family would be ashamed of</li> </ul> |
|                             |              |                                                                                                                                                                                                                                                                                                                                    |                                                                                                                                                                                                                                                                                                                                                                                                                                                                                                                    | <i>The impact of HIV on WLHIV</i>                                                                                                                                                                                                                                                                                                    |
|                             |              |                                                                                                                                                                                                                                                                                                                                    |                                                                                                                                                                                                                                                                                                                                                                                                                                                                                                                    | (i) HIV-related stigma                                                                                                                                                                                                                                                                                                               |
|                             |              |                                                                                                                                                                                                                                                                                                                                    |                                                                                                                                                                                                                                                                                                                                                                                                                                                                                                                    | <ul style="list-style-type: none"> <li>Internalised shame</li> <li>Social rejection</li> </ul>                                                                                                                                                                                                                                       |
|                             |              |                                                                                                                                                                                                                                                                                                                                    |                                                                                                                                                                                                                                                                                                                                                                                                                                                                                                                    | - Higher levels of both social rejection and internalised shame were significantly associated with lower perceived availability of instrumental and emotional support                                                                                                                                                                |
|                             |              |                                                                                                                                                                                                                                                                                                                                    |                                                                                                                                                                                                                                                                                                                                                                                                                                                                                                                    | - Increased availability of both instrumental and emotional support was significantly associated with lower reported levels of social rejection and internalized shame                                                                                                                                                               |
|                             |              |                                                                                                                                                                                                                                                                                                                                    |                                                                                                                                                                                                                                                                                                                                                                                                                                                                                                                    | (ii) Psychological impact                                                                                                                                                                                                                                                                                                            |
|                             |              |                                                                                                                                                                                                                                                                                                                                    |                                                                                                                                                                                                                                                                                                                                                                                                                                                                                                                    | <ul style="list-style-type: none"> <li>Depression</li> <li>Sociodemographic factors associated with depression</li> </ul>                                                                                                                                                                                                            |
|                             |              |                                                                                                                                                                                                                                                                                                                                    |                                                                                                                                                                                                                                                                                                                                                                                                                                                                                                                    | - Single marital status, an unintended pregnancy, and higher levels of social rejection and internalized shame                                                                                                                                                                                                                       |
| 5. Britain, et al 2017 (36) | South Africa | <p>- 623 HIV-infected pregnant WLHIV initiating ART</p> <p>- Quantitative design: Cross-sectional study</p> <p>- Aim: To examine factors associated with social support and stigma among pregnant women initiating antiretroviral therapy in the Western Cape, South Africa; and explore associations with depressive symptoms</p> | <p>- Marital status:</p> <ul style="list-style-type: none"> <li>256 married /cohabiting</li> <li>367 singles</li> </ul> <p>- Participants' age:</p> <ul style="list-style-type: none"> <li>Median age: 28 years</li> <li>Inter-quartile range (IQR): 24–32 years</li> </ul> <p>- Participant recruitment technique:</p> <ul style="list-style-type: none"> <li>Participants were recruited through a large primary care antenatal clinic in the former township of Gugulethu in Cape Town, South Africa</li> </ul> | <p>Multivariable linear regression models</p>                                                                                                                                                                                                                                                                                        |
|                             |              |                                                                                                                                                                                                                                                                                                                                    |                                                                                                                                                                                                                                                                                                                                                                                                                                                                                                                    | <i>The impact of HIV on WLHIV</i>                                                                                                                                                                                                                                                                                                    |
|                             |              |                                                                                                                                                                                                                                                                                                                                    |                                                                                                                                                                                                                                                                                                                                                                                                                                                                                                                    | (i) Psychological impact                                                                                                                                                                                                                                                                                                             |
|                             |              |                                                                                                                                                                                                                                                                                                                                    |                                                                                                                                                                                                                                                                                                                                                                                                                                                                                                                    | <ul style="list-style-type: none"> <li>Fear of dying leading to mother choosing to terminate pregnancy</li> <li>Feeling worried about transmitting HIV to unborn baby</li> <li>Feeling worried about poor economic condition and inability to take care of the child</li> </ul>                                                      |
|                             |              |                                                                                                                                                                                                                                                                                                                                    |                                                                                                                                                                                                                                                                                                                                                                                                                                                                                                                    | (ii) Perceived stigma                                                                                                                                                                                                                                                                                                                |
|                             |              |                                                                                                                                                                                                                                                                                                                                    |                                                                                                                                                                                                                                                                                                                                                                                                                                                                                                                    | <ul style="list-style-type: none"> <li>Fear of children being stigmatised and discriminated within the community due to mother's HIV status</li> <li>Fear of children being denied from school admission</li> </ul>                                                                                                                  |
| 6. Chi, et al., 2010 (6)    | Vietnam      | <p>- 13 WLHIV</p> <p>- Marital status:</p> <ul style="list-style-type: none"> <li>7 married</li> <li>6 widowed</li> </ul> <p>- Qualitative design</p> <p>- Methods: In-depth interview</p> <p>- Aim: To explore their reflections, concerns and dilemmas related to reproductive decisions</p>                                     | <p>- Participants' age:</p> <ul style="list-style-type: none"> <li>30 years old and older</li> </ul> <p>- Participant recruitment technique:</p> <ul style="list-style-type: none"> <li>Participants were recruited using convenient sampling technique</li> <li>Participants were part of a larger research project that investigated reproductive decisions among WLHIV</li> </ul>                                                                                                                               | <p>Thematic analysis</p>                                                                                                                                                                                                                                                                                                             |

|                                |       |                                                                                                                                                                                                                                                                                                                                                                                 |                                                                                                                                                                                                                                                                                                                                                                                                                                                                                                                                                                                 |                   |                                                                                                                                                                                                                                                                                                                                                                                                                                                                                                                                                                                                                                                                                                                                                                                                                                                                                                                                                                                                                                                                  |
|--------------------------------|-------|---------------------------------------------------------------------------------------------------------------------------------------------------------------------------------------------------------------------------------------------------------------------------------------------------------------------------------------------------------------------------------|---------------------------------------------------------------------------------------------------------------------------------------------------------------------------------------------------------------------------------------------------------------------------------------------------------------------------------------------------------------------------------------------------------------------------------------------------------------------------------------------------------------------------------------------------------------------------------|-------------------|------------------------------------------------------------------------------------------------------------------------------------------------------------------------------------------------------------------------------------------------------------------------------------------------------------------------------------------------------------------------------------------------------------------------------------------------------------------------------------------------------------------------------------------------------------------------------------------------------------------------------------------------------------------------------------------------------------------------------------------------------------------------------------------------------------------------------------------------------------------------------------------------------------------------------------------------------------------------------------------------------------------------------------------------------------------|
|                                |       |                                                                                                                                                                                                                                                                                                                                                                                 |                                                                                                                                                                                                                                                                                                                                                                                                                                                                                                                                                                                 |                   | <p><i>The impact of HIV on families of WLHIV</i></p> <p>(i) External stigma and discrimination against children at school</p> <ul style="list-style-type: none"> <li>Teacher told other children not to play with them.</li> <li>Children were placed at a separate desk by teacher and isolated from friends</li> </ul>                                                                                                                                                                                                                                                                                                                                                                                                                                                                                                                                                                                                                                                                                                                                         |
| 7. Conserve, et al., 2014 (25) | Haiti | <p>- Qualitative design</p> <p>- Methods:</p> <ul style="list-style-type: none"> <li>In-depth interview</li> </ul> <p>- Aim:</p> <ul style="list-style-type: none"> <li>To identify the factors influencing maternal HIV serostatus disclosure, examine the breadth of maternal HIV serostatus, and understand the impact of disclosure on mothers and the children.</li> </ul> | <p>- 25 HIV-positive mothers and 26 children (HIV-negative)</p> <p>- Marital status of the mothers:</p> <ul style="list-style-type: none"> <li>Not reported</li> </ul> <p>- Participants' age:</p> <ul style="list-style-type: none"> <li>Children were 10 to 17 years of age</li> <li>Age of the mothers was not reported</li> </ul> <p>- Participant recruitment technique:</p> <ul style="list-style-type: none"> <li>Participants were a part of a larger feasibility study of a psychosocial support intervention for youth affected by HIV and their caregiver</li> </ul> | Thematic analysis | <p><i>The impact of HIV on families of WLHIV</i></p> <p>(i) Psychological impacts on children</p> <ul style="list-style-type: none"> <li>Emotional reactions: feeling or looking sad, hurt, upset, cried</li> </ul> <p>(ii) Social impact (stigma) on children</p> <ul style="list-style-type: none"> <li>Teased by friends about HIV status of the mother</li> <li>Labelled as "little HIVer"</li> <li>Humiliated by friends due to mother's HIV status</li> </ul>                                                                                                                                                                                                                                                                                                                                                                                                                                                                                                                                                                                              |
| 8. Conserve, et al., 2015 (19) | Haiti | <p>- Qualitative design</p> <p>- Methods:</p> <ul style="list-style-type: none"> <li>In-depth interview</li> </ul> <p>- Aim:</p> <ul style="list-style-type: none"> <li>To examine mothers' experiences of impact of HIV illness on their children's well-being and development in Haiti.</li> </ul>                                                                            | <p>- 25 HIV-positive mothers</p> <p>- Marital status:</p> <ul style="list-style-type: none"> <li>Not reported</li> </ul> <p>- Participants' age:</p> <ul style="list-style-type: none"> <li>Not reported</li> </ul> <p>- Participant recruitment technique:</p> <ul style="list-style-type: none"> <li>Participants were a part of a larger feasibility study of a psychosocial support intervention for youth affected by HIV and their caregivers</li> </ul>                                                                                                                  | Thematic analysis | <p><i>The impact of HIV on WLHIV</i></p> <p>(i) Physical impact</p> <ul style="list-style-type: none"> <li>Women's poor physical strength leading to inability to take of children</li> </ul> <p>(ii) External stigma and discrimination</p> <ul style="list-style-type: none"> <li>From community members</li> </ul> <p>(iii) Economic impact</p> <ul style="list-style-type: none"> <li>Loss of job</li> <li>Inability to work due to poor physical strength</li> </ul> <p><i>The impact of HIV on families of WLHIV</i></p> <p>(i) Economic impact</p> <ul style="list-style-type: none"> <li>Family hunger and food insecurity due to women lost their jobs or were unable to work</li> <li>Burdening extended family (mothers) economically to feed and take care of the women's children</li> <li>Selling house</li> </ul> <p>(ii) Impact on children's education</p> <ul style="list-style-type: none"> <li>School attendance and performance were affected due to</li> <li>- Taking care of sick mother</li> <li>- Lack of food to eat before</li> </ul> |

|                            |          |                                                                                                                                                                                                                                                                                                                                    |                                                                                                                                                                                                                                                                                                                                                                                                                                                                                                                                                                                                                                                                                                                                                                                                                                                             |                                                                                                                                                                                                                                                                                                                                                                                                                                                                                                                                                                                                                                                                                           |
|----------------------------|----------|------------------------------------------------------------------------------------------------------------------------------------------------------------------------------------------------------------------------------------------------------------------------------------------------------------------------------------|-------------------------------------------------------------------------------------------------------------------------------------------------------------------------------------------------------------------------------------------------------------------------------------------------------------------------------------------------------------------------------------------------------------------------------------------------------------------------------------------------------------------------------------------------------------------------------------------------------------------------------------------------------------------------------------------------------------------------------------------------------------------------------------------------------------------------------------------------------------|-------------------------------------------------------------------------------------------------------------------------------------------------------------------------------------------------------------------------------------------------------------------------------------------------------------------------------------------------------------------------------------------------------------------------------------------------------------------------------------------------------------------------------------------------------------------------------------------------------------------------------------------------------------------------------------------|
|                            |          |                                                                                                                                                                                                                                                                                                                                    |                                                                                                                                                                                                                                                                                                                                                                                                                                                                                                                                                                                                                                                                                                                                                                                                                                                             | <ul style="list-style-type: none"> <li>- going to school or going to school without eating any food leading to children coming back home earlier</li> <li>- Poor economic condition leading to inability to send children to school</li> <li>- Mother's HIV status affects children's focus on studying</li> </ul> <p>(iii) External stigma and discrimination against children due to their mothers' HIV status</p> <p>(iv) Family separation</p> <ul style="list-style-type: none"> <li>• Left by husband due to HIV status</li> </ul> <p>(v) Psychological impact on children</p> <ul style="list-style-type: none"> <li>• Feeling sad about mother's poor health condition</li> </ul> |
| 9. Cuca, et al., 2012 (13) | Kenya    | <p>- Quantitative design:</p> <ul style="list-style-type: none"> <li>• Cross-sectional study</li> </ul> <p>- Aim:</p> <ul style="list-style-type: none"> <li>• To examine factors associated with anticipating and experiencing HIV-related stigma among pregnant women attending antenatal care clinics in rural Kenya</li> </ul> | <p>- 411 women:</p> <ul style="list-style-type: none"> <li>• 154 WLHIV, 165 HIV-negative women, 90 women with unknown HIV status</li> </ul> <p>- Marital status:</p> <ul style="list-style-type: none"> <li>• Most were married and currently living with a male partner (no clear information marital status of the women)</li> </ul> <p>- Participants' age:</p> <ul style="list-style-type: none"> <li>• Ranged between 18 and 49 years old</li> <li>• Mean age: 23.6</li> </ul> <p>- Participant recruitment technique:</p> <ul style="list-style-type: none"> <li>• Participants were part of a larger longitudinal study conducted by the University of California, and the Kenya Medical Research Institute, who jointly run the Family AIDS Care and Education Services program in Kenya</li> </ul> <p>- Only results about WLHIV are included.</p> | <p>Bivariate logistic, linear regression analysis and multivariate models</p> <p><i>The impact of HIV on WLHIV</i></p> <p>(i) External stigma and discrimination</p> <ul style="list-style-type: none"> <li>• Verbal abuse</li> <li>• Healthcare neglect</li> <li>• Social isolation</li> <li>• Workplace stigma</li> </ul>                                                                                                                                                                                                                                                                                                                                                               |
| 10. Dane, 2002 (31)        | Thailand | <p>- Qualitative design</p> <p>- Methods:</p> <ul style="list-style-type: none"> <li>• Semi-structured interview</li> </ul> <p>- Aim:</p> <ul style="list-style-type: none"> <li>• To examine the</li> </ul>                                                                                                                       | <p>- 26 WLHIV</p> <p>- Marital status:</p> <ul style="list-style-type: none"> <li>• All widowed and one remarried</li> </ul> <p>- Participants' age:</p> <ul style="list-style-type: none"> <li>• Ranged between 23</li> </ul>                                                                                                                                                                                                                                                                                                                                                                                                                                                                                                                                                                                                                              | <p>Content analysis</p> <p><i>The impact of HIV on WLHIV</i></p> <p>(i) Psychological impact</p> <ul style="list-style-type: none"> <li>• Feeling isolated</li> </ul> <p>(ii) External stigma and discrimination</p> <ul style="list-style-type: none"> <li>• From family members</li> <li>- Women were not allowed</li> </ul>                                                                                                                                                                                                                                                                                                                                                            |



|                             |          |                                                                                                                                                                                                                                                                           |                                                                                                                                                                                                                                                                                                                                                                                                                                                                                                                                                                                                                                                 |                                                                |                                                                                                                                                           |                                                                                                                                                                                                                                                                                                                                                                                                                                                                                                                                                                                                                                                              |
|-----------------------------|----------|---------------------------------------------------------------------------------------------------------------------------------------------------------------------------------------------------------------------------------------------------------------------------|-------------------------------------------------------------------------------------------------------------------------------------------------------------------------------------------------------------------------------------------------------------------------------------------------------------------------------------------------------------------------------------------------------------------------------------------------------------------------------------------------------------------------------------------------------------------------------------------------------------------------------------------------|----------------------------------------------------------------|-----------------------------------------------------------------------------------------------------------------------------------------------------------|--------------------------------------------------------------------------------------------------------------------------------------------------------------------------------------------------------------------------------------------------------------------------------------------------------------------------------------------------------------------------------------------------------------------------------------------------------------------------------------------------------------------------------------------------------------------------------------------------------------------------------------------------------------|
|                             |          | <p>extent of disclosure and its effects on the women in three areas: children, family and friends.</p>                                                                                                                                                                    | <p>and 47 years old</p> <ul style="list-style-type: none"> <li>• Median age was 33.1 years</li> </ul> <p>- Participant recruitment technique:</p> <ul style="list-style-type: none"> <li>• Participants were recruited using convenient sampling technique</li> </ul>                                                                                                                                                                                                                                                                                                                                                                           |                                                                | <p>to cook for other or use others' utensils</p> <ul style="list-style-type: none"> <li>- Women were told to hide HIV status from other people</li> </ul> | <p><i>The impact of HIV on families of WLHIV</i></p> <p>(i) External stigma and discrimination against children and other family members of WLHIV</p>                                                                                                                                                                                                                                                                                                                                                                                                                                                                                                        |
| 11. de Souza, 2010 (32)     | India    | <p>- Qualitative design</p> <p>- Methods:</p> <ul style="list-style-type: none"> <li>• In-depth Interview</li> </ul> <p>- Aim:</p> <ul style="list-style-type: none"> <li>• To understand women's experience of power and powerlessness</li> </ul>                        | <p>- Two WLHIV</p> <p>- Marital status:</p> <ul style="list-style-type: none"> <li>• Remarried and widowed</li> </ul> <p>- Participants' age:</p> <ul style="list-style-type: none"> <li>• 31 and 33 years of age.</li> </ul> <p>- Participant recruitment technique:</p> <ul style="list-style-type: none"> <li>• Participants were recruited using purposive sampling technique</li> <li>• Participants were recruited from or part of a larger study identifying NGO practices to mobilize communities for HIV/AIDS prevention.</li> </ul> <p>- These two women were chosen because they share similar biography and illness narratives.</p> | Content analysis                                               |                                                                                                                                                           | <p><i>The impact of HIV on WLHIV</i></p> <p>(i) External stigma and discrimination</p> <ul style="list-style-type: none"> <li>• From parents and siblings</li> <li>• From parents-in-law</li> <li>• From community members</li> </ul>                                                                                                                                                                                                                                                                                                                                                                                                                        |
| 12. Halli, et al., 2017 (7) | India    | <p>- Quantitative design:</p> <ul style="list-style-type: none"> <li>• Cross-sectional study</li> </ul> <p>- Aim</p> <ul style="list-style-type: none"> <li>• To examine HIV/AIDS-related stigma and discrimination in a high-HIV-prevalence district in India</li> </ul> | <p>- 633 married WLHIV</p> <p>- Marital status:</p> <ul style="list-style-type: none"> <li>• Married</li> </ul> <p>- Participants' age:</p> <ul style="list-style-type: none"> <li>• Ranged between 15 and 29 years old.</li> </ul> <p>- Participant recruitment technique:</p> <ul style="list-style-type: none"> <li>• Participants were randomly selected from a unique cross-sectional quantitative study conducted among HIV-positive women in Bagalkot District of Karnataka, India.</li> </ul>                                                                                                                                           | Bivariate analysis and multivariate logistic regression models |                                                                                                                                                           | <p><i>The impact of HIV on WLHIV</i></p> <p>i) External stigma and discrimination</p> <ul style="list-style-type: none"> <li>• From parents and siblings</li> <li>• From husband and husband's family members</li> <li>• From community members (friends and neighbours)</li> <li>• Sociodemographic factors associated with stigma and discrimination from husband and husband's family members against WLHIV:</li> </ul> <ul style="list-style-type: none"> <li>- Occupation and age of the husband</li> <li>- Higher age gap between spouses and poor household status</li> <li>- Older age of the husband and lower household economic status</li> </ul> |
| 13. Manopai boon, et al.,   | Thailand | <p>- Quantitative design:</p> <ul style="list-style-type: none"> <li>• Prospective cohort</li> </ul>                                                                                                                                                                      | <p>- 129 postpartum WLHIV</p> <p>- Marital status:</p>                                                                                                                                                                                                                                                                                                                                                                                                                                                                                                                                                                                          | Comparison                                                     |                                                                                                                                                           | <p><i>The impact of HIV on WLHIV</i></p> <p>(i) Psychological impacts</p>                                                                                                                                                                                                                                                                                                                                                                                                                                                                                                                                                                                    |

|                                                                                                                                                                                                                                                                                                                                          |                                                                                                                                                   |                                                                                                                                                                                                                                                                                                                                                                                                                                                                                                                              |                                                                                                                                                                                                                                                                                                                                                                                                     |                                                                                                                                                                                                                                                                                                                                                                                                                                                                                                                                                                                                                                                                                                                                                                                                                                           |                                                                                                                                                                                                                                                                                                                                      |
|------------------------------------------------------------------------------------------------------------------------------------------------------------------------------------------------------------------------------------------------------------------------------------------------------------------------------------------|---------------------------------------------------------------------------------------------------------------------------------------------------|------------------------------------------------------------------------------------------------------------------------------------------------------------------------------------------------------------------------------------------------------------------------------------------------------------------------------------------------------------------------------------------------------------------------------------------------------------------------------------------------------------------------------|-----------------------------------------------------------------------------------------------------------------------------------------------------------------------------------------------------------------------------------------------------------------------------------------------------------------------------------------------------------------------------------------------------|-------------------------------------------------------------------------------------------------------------------------------------------------------------------------------------------------------------------------------------------------------------------------------------------------------------------------------------------------------------------------------------------------------------------------------------------------------------------------------------------------------------------------------------------------------------------------------------------------------------------------------------------------------------------------------------------------------------------------------------------------------------------------------------------------------------------------------------------|--------------------------------------------------------------------------------------------------------------------------------------------------------------------------------------------------------------------------------------------------------------------------------------------------------------------------------------|
| 1998 (20)                                                                                                                                                                                                                                                                                                                                | <p>study</p> <p>- Aim</p> <ul style="list-style-type: none"> <li>• Impact of HIV on families of HIV-infected women who just gave birth</li> </ul> | <ul style="list-style-type: none"> <li>• Married</li> </ul> <p>- Participants' age:</p> <ul style="list-style-type: none"> <li>• 33% of the women were less than 20 years of age</li> </ul> <p>- Participant recruitment technique:</p> <ul style="list-style-type: none"> <li>• Participants were recruited using convenient sampling technique</li> <li>• Participants were part of a prospective cohort study of mother-to-child transmission among 295 HIV-infected pregnant women and their newborn children</li> </ul> | <p>made using 2x2 X<sup>2</sup> test and X<sup>2</sup> was used to compare paired results</p>                                                                                                                                                                                                                                                                                                       | <ul style="list-style-type: none"> <li>• Depression and worry: related to children's health and family's future and children growing up without their mother</li> </ul> <p>(ii) Stigma and discrimination</p> <ul style="list-style-type: none"> <li>• Perceived stigma <ul style="list-style-type: none"> <li>- Women believed that HIV was a disease about which their family would be ashamed, leading to concealment of HIV status from other</li> </ul> </li> <li>• External stigma from community members <ul style="list-style-type: none"> <li>- Women were ostracised by their neighbour</li> <li>- Neighbour refused to share food</li> <li>- Friends stopped visiting</li> <li>- External stigma from family members</li> <li>- Separation of women's personal items from those of other family members</li> </ul> </li> </ul> |                                                                                                                                                                                                                                                                                                                                      |
| <p><i>The impact on families of WLHIV</i></p>                                                                                                                                                                                                                                                                                            |                                                                                                                                                   |                                                                                                                                                                                                                                                                                                                                                                                                                                                                                                                              |                                                                                                                                                                                                                                                                                                                                                                                                     |                                                                                                                                                                                                                                                                                                                                                                                                                                                                                                                                                                                                                                                                                                                                                                                                                                           |                                                                                                                                                                                                                                                                                                                                      |
| <p>(i) Family separation (mother-child separation)</p>                                                                                                                                                                                                                                                                                   |                                                                                                                                                   |                                                                                                                                                                                                                                                                                                                                                                                                                                                                                                                              |                                                                                                                                                                                                                                                                                                                                                                                                     |                                                                                                                                                                                                                                                                                                                                                                                                                                                                                                                                                                                                                                                                                                                                                                                                                                           |                                                                                                                                                                                                                                                                                                                                      |
| <p>(ii) Impacts of children</p>                                                                                                                                                                                                                                                                                                          |                                                                                                                                                   |                                                                                                                                                                                                                                                                                                                                                                                                                                                                                                                              |                                                                                                                                                                                                                                                                                                                                                                                                     |                                                                                                                                                                                                                                                                                                                                                                                                                                                                                                                                                                                                                                                                                                                                                                                                                                           |                                                                                                                                                                                                                                                                                                                                      |
| <ul style="list-style-type: none"> <li>• Children were responsibilities for household chores</li> <li>• Children were not allowed to play with other children from the neighbourhood</li> </ul>                                                                                                                                          |                                                                                                                                                   |                                                                                                                                                                                                                                                                                                                                                                                                                                                                                                                              |                                                                                                                                                                                                                                                                                                                                                                                                     |                                                                                                                                                                                                                                                                                                                                                                                                                                                                                                                                                                                                                                                                                                                                                                                                                                           |                                                                                                                                                                                                                                                                                                                                      |
| <p>(iii) Economic impact</p>                                                                                                                                                                                                                                                                                                             |                                                                                                                                                   |                                                                                                                                                                                                                                                                                                                                                                                                                                                                                                                              |                                                                                                                                                                                                                                                                                                                                                                                                     |                                                                                                                                                                                                                                                                                                                                                                                                                                                                                                                                                                                                                                                                                                                                                                                                                                           |                                                                                                                                                                                                                                                                                                                                      |
| <ul style="list-style-type: none"> <li>• Reduced family income <ul style="list-style-type: none"> <li>- Due to husbands being sick or died, separation of husbands, unemployment, job instability</li> </ul> </li> <li>• Women decided not to apply for a job once they knew that a company requested HIV test for applicants</li> </ul> |                                                                                                                                                   |                                                                                                                                                                                                                                                                                                                                                                                                                                                                                                                              |                                                                                                                                                                                                                                                                                                                                                                                                     |                                                                                                                                                                                                                                                                                                                                                                                                                                                                                                                                                                                                                                                                                                                                                                                                                                           |                                                                                                                                                                                                                                                                                                                                      |
| 14. Mathew, et al., 2019 (33)                                                                                                                                                                                                                                                                                                            | Thailand                                                                                                                                          | <p>- Qualitative design</p> <p>- Methods:</p> <ul style="list-style-type: none"> <li>• Semi-structured qualitative interview</li> </ul> <p>- Aim</p> <ul style="list-style-type: none"> <li>• To explore the perspectives of young adults living with HIV in Bangkok regarding the influence of</li> </ul>                                                                                                                                                                                                                   | <p>- 14 females and 9 males.</p> <p>- Marital status:</p> <ul style="list-style-type: none"> <li>• Single</li> </ul> <p>- Participants' age:</p> <ul style="list-style-type: none"> <li>• 15-24 years old</li> </ul> <p>- Participant recruitment technique:</p> <ul style="list-style-type: none"> <li>• Participants were recruited using convenient and purposive sampling techniques</li> </ul> | Thematic analysis                                                                                                                                                                                                                                                                                                                                                                                                                                                                                                                                                                                                                                                                                                                                                                                                                         | <p><i>The impact of HIV on WLHIV</i></p> <p>(i) Perceived stigma</p> <ul style="list-style-type: none"> <li>• The belief that other people will dislike and show negative reactions if one's HIV status is known</li> <li>• The belief that one will be excluded or denied from a certain job because of one's HIV status</li> </ul> |

|                               |                                             |                                                                                                                                                                                                                                                                                                                                       |                                                                                                                                                                                                                                                                                                                                                                                                                                                                          |                                                                                                                                                                                                                                                                                                                                                                                                                                                                                                                                                                                                                                                                                                                                                                                                                                                                                                                                                                                      |
|-------------------------------|---------------------------------------------|---------------------------------------------------------------------------------------------------------------------------------------------------------------------------------------------------------------------------------------------------------------------------------------------------------------------------------------|--------------------------------------------------------------------------------------------------------------------------------------------------------------------------------------------------------------------------------------------------------------------------------------------------------------------------------------------------------------------------------------------------------------------------------------------------------------------------|--------------------------------------------------------------------------------------------------------------------------------------------------------------------------------------------------------------------------------------------------------------------------------------------------------------------------------------------------------------------------------------------------------------------------------------------------------------------------------------------------------------------------------------------------------------------------------------------------------------------------------------------------------------------------------------------------------------------------------------------------------------------------------------------------------------------------------------------------------------------------------------------------------------------------------------------------------------------------------------|
|                               |                                             | <p>stigma and discrimination in education, employment, health care, personal relationships, and perceptions of self</p>                                                                                                                                                                                                               | <p>- Only the results about the impact of HIV on the female participants are included.</p>                                                                                                                                                                                                                                                                                                                                                                               |                                                                                                                                                                                                                                                                                                                                                                                                                                                                                                                                                                                                                                                                                                                                                                                                                                                                                                                                                                                      |
| 15. Nguyen, et al., 2009 (34) | Vietnam                                     | <p>- Qualitative design<br/>- Methods:<br/>• In-depth interview<br/>- Aim:<br/>• To explore the experience of 30 WLHIV in Vietnam in accessing HIV-related postnatal care, the role of felt and enacted stigma in accessing services, and the effects of participation in a self-help group on utilization of available services.</p> | <p>- 30 married WLHIV<br/>- Marital status:<br/>• Married<br/>- Participants' age:<br/>• Ranged between 25 and 35 years.<br/>- Participant recruitment technique:<br/>• Participants were recruited using convenient sampling technique<br/>• Participants were recruited through healthcare facilities and referral of healthcare professionals</p>                                                                                                                     | <p>Thematic analysis</p> <p><i>The impact of HIV on WLHIV</i><br/>(i) External stigma and discrimination</p> <ul style="list-style-type: none"> <li>• From husband's family (mother and sister)</li> <li>• From community members</li> <li>• From healthcare professionals</li> </ul> <p><i>The impact of HIV on families of WLHIV</i><br/>(i) External stigma and discrimination</p> <ul style="list-style-type: none"> <li>• From husband's family (mother and sister) <ul style="list-style-type: none"> <li>- Bowls and chopsticks were boiled by sister-in-law</li> </ul> </li> </ul> <p>(ii) Economic impact</p> <ul style="list-style-type: none"> <li>• Loss of job/family business</li> </ul>                                                                                                                                                                                                                                                                               |
| 16. Paxton, et al., 2005 (8)  | India, Indonesia, Thailand, the Philippines | <p>- Quantitative design:<br/>• Cross-sectional study<br/>- Aim:<br/>• To develop an understanding of the nature, pattern and extent of AIDS-related discrimination in several Asian countries</p>                                                                                                                                    | <p>- 764 PLHIV in four countries (India 302; Indonesia 42; Thailand 338; the Philippines 82)<br/>- 348 respondents were female:<br/>• 40% married<br/>• 50% widowed<br/>• 10% single<br/>- 394 were male, six were transgender and for five sex was not recorded<br/>- Participants' age:<br/>• Not reported<br/>- Participant recruitment technique:<br/>• Participants were recruited using snowball sampling technique.<br/>- Only results about WLHIV were used.</p> | <p>Chi square test</p> <p><i>The impact of HIV on WLHIV</i><br/>(i) External stigma and discrimination</p> <ul style="list-style-type: none"> <li>• From healthcare professionals <ul style="list-style-type: none"> <li>- Refusal of treatment or a delay in the provision of healthcare</li> <li>- Being coerced into an HIV test</li> <li>- Undergoing mandatory testing while they were pregnant or because of the illness of a child</li> <li>- Being advised not to have children after diagnosis without giving information about prevention of mother-to-child transmission.</li> <li>- Being coerced into an abortion or sterilization after diagnosis</li> <li>- Losing or being denied private insurance once their HIV status was known and discriminated in relation to private insurance</li> </ul> </li> <li>• From community members <ul style="list-style-type: none"> <li>- Being refused entry to, asked to leave or removed from a public</li> </ul> </li> </ul> |

- 
- establishment (including places of religious worship)
  - Changing their place of residence due to their HIV status
  - Being excluded from social functions due to their status
  - Being physically assaulted because of their status
  - Being required to disclose their HIV status in order to enter another country
  - Being excluded from usual activities
  - Being excluded from associations or clubs due to their status and/or restricted in their ability to meet with other PLHIV
- From family members
    - Being excluded from usual household activities such as cooking, sharing food or eating implements and sleeping in the same room as others.
    - Losing financial support from their spouse or other family members due to HIV status
    - Being chased her out of her home by mother in-law due HIV status
  - At workplace
    - Loss of jobs
    - Change in job description or duties
    - Loss prospects for promotion

*The impact of HIV on families of WLHIV*

(i) Impact of children's education

- children were denied admission into schools

(ii) Family separation

- Children involuntarily taken away from them due to their HIV status
- Desertion/abandonment by their spouse because of their diagnosis

|                                    |        |                                                                                                                                                                                                                                                                                                                                                                    |                                                                                                                                                                                                                                                                                                                                                                                                                                                                                                                                                                                                                                              |                            |                                                                                                                                                                                                                                                                                                                                                                                                                                                                                                                                                                                                                                       |
|------------------------------------|--------|--------------------------------------------------------------------------------------------------------------------------------------------------------------------------------------------------------------------------------------------------------------------------------------------------------------------------------------------------------------------|----------------------------------------------------------------------------------------------------------------------------------------------------------------------------------------------------------------------------------------------------------------------------------------------------------------------------------------------------------------------------------------------------------------------------------------------------------------------------------------------------------------------------------------------------------------------------------------------------------------------------------------------|----------------------------|---------------------------------------------------------------------------------------------------------------------------------------------------------------------------------------------------------------------------------------------------------------------------------------------------------------------------------------------------------------------------------------------------------------------------------------------------------------------------------------------------------------------------------------------------------------------------------------------------------------------------------------|
| 2018 (11)                          |        | <ul style="list-style-type: none"> <li>• Cross-sectional study</li> <li>- Aim</li> <li>• To explore the psychological distress of HIV-infected pregnant women, and analyse the possible influencing factors</li> </ul>                                                                                                                                             | <ul style="list-style-type: none"> <li>- Marital status:               <ul style="list-style-type: none"> <li>• Married</li> </ul> </li> <li>- Participants' age:               <ul style="list-style-type: none"> <li>• The average age of the participants was 25.1 ± 5.8 years</li> </ul> </li> <li>- Participant recruitment technique:               <ul style="list-style-type: none"> <li>• Participants were recruited using convenient sampling technique</li> </ul> </li> </ul>                                                                                                                                                    | linear regression analysis | (i) Psychological impact <ul style="list-style-type: none"> <li>• Anxiety and depression</li> <li>• Factors associated with psychological distress               <ul style="list-style-type: none"> <li>- Family misfortune, Medicaid, chronic disease or high-risk pregnancy, viral load, CD4 <math>\beta</math>T cell count, infection and confidentiality</li> </ul> </li> </ul>                                                                                                                                                                                                                                                   |
| 18. Ruffell, 2017 (12)             | Uganda | <ul style="list-style-type: none"> <li>- Qualitative design</li> <li>- Methods:               <ul style="list-style-type: none"> <li>• In-depth interview</li> </ul> </li> </ul>                                                                                                                                                                                   | <ul style="list-style-type: none"> <li>- One WLHIV</li> <li>- Marital status:               <ul style="list-style-type: none"> <li>• Remarried</li> </ul> </li> <li>- Participant's age:               <ul style="list-style-type: none"> <li>• 58 years old</li> </ul> </li> <li>- Participant recruitment technique:               <ul style="list-style-type: none"> <li>• Not method</li> </ul> </li> <li>- The narrative of this woman was chosen in this case study as it illustrates the negative impact that stigma and discrimination can have on mental and consequently physical health, both acutely and chronically.</li> </ul> | Content analysis           | <p><i>The impact of HIV on WLHIV</i></p> (i) External stigma and discrimination <ul style="list-style-type: none"> <li>• From parents-in-law: being chased away from home</li> <li>• From friends: Woman's possessions were burnt by friends</li> </ul> (ii) Perceived stigma <ul style="list-style-type: none"> <li>• The belief that other people are talking or singing about her</li> </ul> (ii) Psychological impacts <ul style="list-style-type: none"> <li>• Extreme paranoia, less sleep, panic attack, dreams of drowning, and depression</li> </ul>                                                                         |
| 19. Subramanian, et al., 2013 (35) | India  | <ul style="list-style-type: none"> <li>- Qualitative design</li> <li>- Methods:               <ul style="list-style-type: none"> <li>• In-depth interview</li> </ul> </li> <li>- Aim:               <ul style="list-style-type: none"> <li>• To explore the difficulties faced by rural HIV positive mothers during the intra-natal period.</li> </ul> </li> </ul> | <ul style="list-style-type: none"> <li>- 21 WLHIV who were mothers</li> <li>- Marital status:               <ul style="list-style-type: none"> <li>• Not reported</li> </ul> </li> <li>- Participants' age:               <ul style="list-style-type: none"> <li>• Ranged between 20 and 39 years.</li> </ul> </li> <li>- Participant recruitment technique:               <ul style="list-style-type: none"> <li>• Not reported</li> </ul> </li> </ul>                                                                                                                                                                                      | Content analysis           | <p><i>The impact of HIV on WLHIV</i></p> (i) External stigma and discrimination <ul style="list-style-type: none"> <li>• From healthcare professionals               <ul style="list-style-type: none"> <li>- Avoidance of physical examination, rude behaviour like throwing of records on the face, discriminatory comments, unnecessary referrals and even refusal to provide intra-partum services</li> </ul> </li> <li>- Leading to women concealing their HIV status, not accessing healthcare services or looking for healthcare services in other places where their HIV status is unknown to healthcare providers</li> </ul> |
| 20. Withell, 2000 (37)             | Uganda | <ul style="list-style-type: none"> <li>- Qualitative design</li> <li>- Methods:               <ul style="list-style-type: none"> <li>• Semi-structured interview</li> </ul> </li> <li>- Aim:               <ul style="list-style-type: none"> <li>• To explore what assisted them to cope and identify their future</li> </ul> </li> </ul>                         | <ul style="list-style-type: none"> <li>- Seven WLHIV</li> <li>- Marital status:               <ul style="list-style-type: none"> <li>• 4 widowed</li> <li>• 2 married</li> <li>• 1 separated</li> </ul> </li> <li>- Participants' age:               <ul style="list-style-type: none"> <li>• Ranged between 26 and 43 years</li> </ul> </li> <li>- Participant recruitment</li> </ul>                                                                                                                                                                                                                                                       | Thematic analysis          | <p><i>The impact of HIV on WLHIV</i></p> (i) Psychological impact <ul style="list-style-type: none"> <li>• Worry and fear of the health and future of the children</li> </ul> (ii) External stigma and discrimination <ul style="list-style-type: none"> <li>• From family, relatives and friends               <ul style="list-style-type: none"> <li>- Social isolation and rejection</li> </ul> </li> </ul>                                                                                                                                                                                                                        |

|                              |          |                                                                                                                                                                                                                                                                                                                                                                                                          |                                                                                                                                                                                                                                                                                                                                                                                                                             |                                                                                                                                                                                                                                                                                                                                                                                                                                                                                                                                           |
|------------------------------|----------|----------------------------------------------------------------------------------------------------------------------------------------------------------------------------------------------------------------------------------------------------------------------------------------------------------------------------------------------------------------------------------------------------------|-----------------------------------------------------------------------------------------------------------------------------------------------------------------------------------------------------------------------------------------------------------------------------------------------------------------------------------------------------------------------------------------------------------------------------|-------------------------------------------------------------------------------------------------------------------------------------------------------------------------------------------------------------------------------------------------------------------------------------------------------------------------------------------------------------------------------------------------------------------------------------------------------------------------------------------------------------------------------------------|
|                              | concerns | technique: <ul style="list-style-type: none"> <li>Participants were recruited using convenient sampling technique</li> </ul>                                                                                                                                                                                                                                                                             | (iii) Physical impact <ul style="list-style-type: none"> <li>Pain and suffering</li> </ul> (iv) Economic impact <ul style="list-style-type: none"> <li>Loss of job</li> </ul> <p><i>The impact of HIV on families of WLHIV</i></p> (i) Economic impact <ul style="list-style-type: none"> <li>Increased family health-related expenditure</li> </ul>                                                                        |                                                                                                                                                                                                                                                                                                                                                                                                                                                                                                                                           |
| 21. Yang, 2015 (9)           | Cambodia | - Qualitative design<br>- Methods: <ul style="list-style-type: none"> <li>In-depth interview</li> </ul> - Aim <ul style="list-style-type: none"> <li>To explore women's perspectives on their life changes after being infected with HIV by their husbands.</li> </ul>                                                                                                                                   | - 15 WLHIV<br>- Marital status: <ul style="list-style-type: none"> <li>Married</li> </ul> - Participants' age: <ul style="list-style-type: none"> <li>Ranged between 30 and 42 years</li> </ul> - Participant recruitment technique: <ul style="list-style-type: none"> <li>Participants were recruited using snowball sampling technique</li> </ul>                                                                        | (i) thematic analysis,<br>(ii) analysis of episodes, and (iii) identification of paradigm cases<br><p><i>The impact of HIV on families of WLHIV</i></p> (i) Family separation <ul style="list-style-type: none"> <li>Children live with other families for better housing and due to mother's sickness</li> </ul> (ii) Economic impact <ul style="list-style-type: none"> <li>Food insecurity, hunger and poverty</li> <li>Increased family health expenditure</li> <li>Selling of family properties</li> </ul>                           |
| 22. Yator, et al., 2016 (38) | Kenya    | - Quantitative design: <ul style="list-style-type: none"> <li>Cross-sectional study</li> </ul> - Aim <ul style="list-style-type: none"> <li>To determine the prevalence and severity of postpartum depression among WLHIV and to further understand the impact of stigma and psychosocial factors in 123 WLHIV attending prevention of mother-to-child transmission clinic in Nairobi, Kenya.</li> </ul> | - 123 postpartum WLHIV<br>- Marital status: <ul style="list-style-type: none"> <li>84 married</li> <li>29 single</li> <li>2 divorced</li> <li>7 separated</li> <li>2 co-habiting</li> </ul> - Participants' age: <ul style="list-style-type: none"> <li>Ranged between 19 and 48</li> <li>Mean age: 31 years</li> </ul> - Participant recruitment technique: <ul style="list-style-type: none"> <li>Not reported</li> </ul> | Bivariate analyses using chi-square/Fisher's exact and Kendall's tau-b tests, and multivariate regression model<br><p><i>The impact of HIV on WLHIV</i></p> (i) Psychological impact <ul style="list-style-type: none"> <li>Depression</li> <li>Sociodemographic factors associated with depression among WLHIV               <ul style="list-style-type: none"> <li>Lower level of education</li> <li>Lack of family support</li> <li>Negative self-perceived stigma</li> </ul> </li> </ul> (ii) External stigma and internalised stigma |

### 3.2. Impact of HIV on WLHIV and their families

Two thematic categories including individual level and family level impact (Figure 2) were identified. Direct quotes from participants were also selected from the studies to support the descriptive synthesis of each theme as summarised in Table 2. From each of the two categories above, a further synthesis (explanatory phase) was undertaken where different HIV-related impacts were mapped into a comprehensive Conceptual Model of complex impact (Figure 2) endured by WLHIV and their families. These were subcategorised into five thematic areas (Figure 2) including: (i) psychological impact on WLHIV and their families, (ii) physical health impact on WLHIV and

intimate partner violence against them, (iii) negative social impact on WLHIV and their families, and (iv) economic impact on WLHIV and their families. These themes are discussed in turn below. The mechanisms through which these influence the lives of WLHIV and their families, and interrelationships between them are also described.

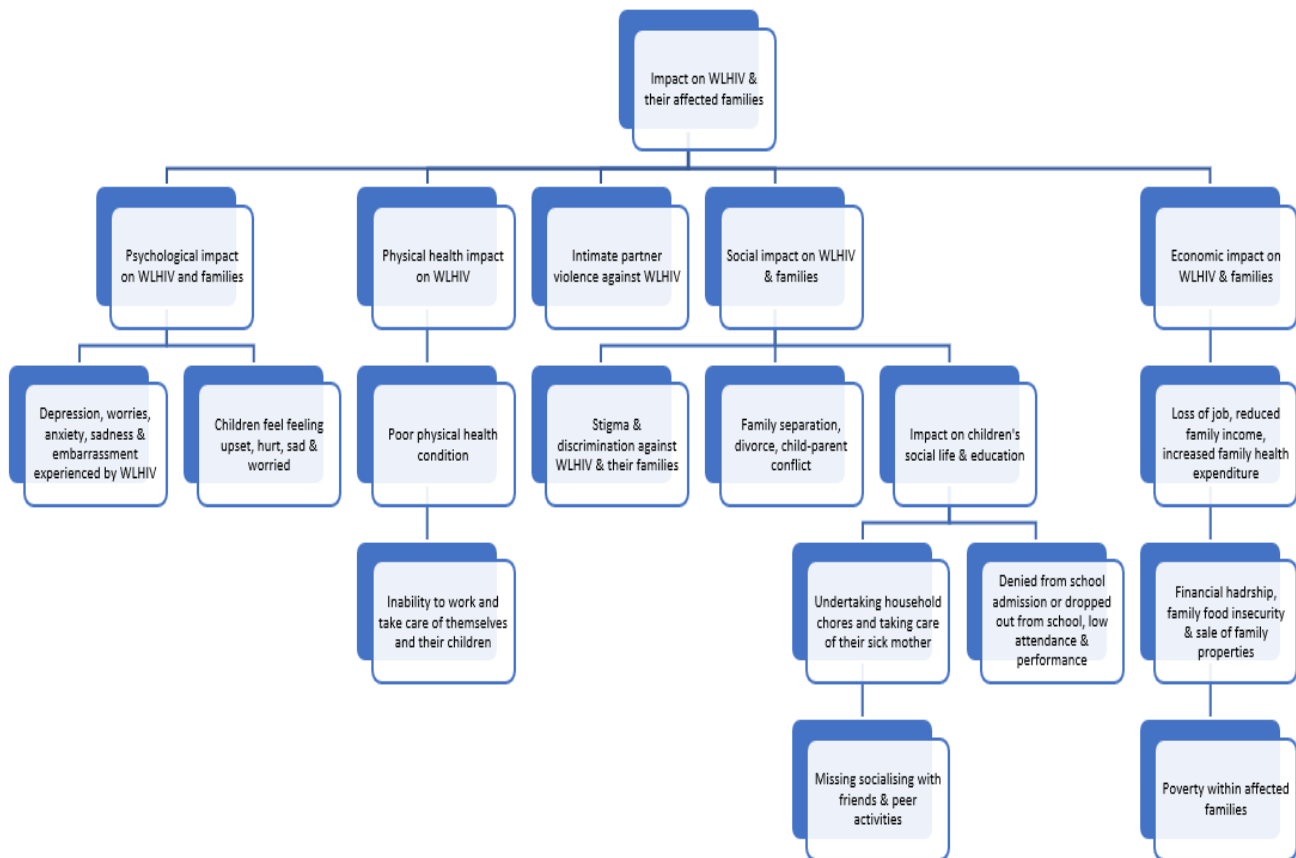

**Figure 2.** Conceptual Model for HIV impacts on individuals and families.

### 3.2.1. Psychological impact of HIV on WLHIV and their families

Thirteen studies reported various psychological challenges faced by WLHIV and their families, especially children (5, 6, 11, 12, 16, 19, 20, 25, 30, 31, 36-38). Psychological challenges such as depression, worries, anxiety, sadness and embarrassment were the most common experiences among WLHIV (12, 16). These psychological challenges were often triggered by a range of concerns or factors the women felt or faced following an HIV diagnosis. Moreover, children of WLHIV were psychologically impacted manifesting in a range of emotional responses including sadness and worries about their mother HIV status and poor health condition (19, 25). Advanced stage of HIV infection, fear of breach of confidentiality about HIV status and feeling like a shame to family were also noted as factors associated with the psychological impact on WLHIV (11, 16, 30). Fear of transmitting HIV infection to unborn babies (6), concerns about the future of children upon WLHIV untimely death (5, 6, 20, 37), and the lack of resources to take care of their children (6, 30) put additional psychological stress to WLHIV. The lack of social support, social rejection or isolation, perceived stigma (16, 31, 36, 38) and poor economic conditions due to reduction in work and increase in family healthcare expenses (6, 30) caused depression and increased fear among WLHIV. Additional factors such as lower education attainment, lack of family support (30, 38), being primary caretaker for children, cessation of the relationships with a partner and/or partner's death (30), poor health, single marital status, unintended pregnancies (36), predicted poor psychological functioning of WLHIV.

### 3.2.2. Physical health impact of HIV on WLHIV and intimate partner violence (IPV) against them

Three studies reported reduced physical strength (9, 19), difficult sleeping, dizziness and exhaustion (37) after HIV diagnosis among WLHIV. These physical issues were reported to jeopardise the day to day functioning of WLHIV, which affected the way they looked after their children and the ability to work and provide for their children (9, 19).

Two studies reported that a diagnosis of HIV in women results in IPV and maltreatment towards them (5, 9). Husbands' rage towards wives' HIV diagnosis, women's tolerance of husbands' behaviours and women's commitment to living together for the sake of children were reported to heighten IPV against WLHIV (5, 9).

### 3.2.3. Social impact of HIV on WLHIV and their families

#### 3.2.3.1. Stigma and discrimination against WLHIV

Nine studies reported women's feelings of anticipated stigma following their HIV diagnosis, and they believed that people, including family members, would react negatively to their HIV status (16, 33, 40). For example, they hold the belief that other people will disclose their status and family members will reject them after finding out about the HIV diagnosis (12, 16, 20, 31, 33). Such belief was based on HIV-related discriminatory and stigmatising attitudes and behaviours previously experienced by other PLHIV, and have often led to women isolating themselves to hide the HIV diagnosis from family members (12, 20, 31). A lower perception of social support from other people within their communities (36) and the fear of children being stigmatised (6) were also expressed as a form of anticipated stigma, leading to WLHIV avoiding participation in communal activities. Being older women, having limited education and having a husband with multiple wives (13) were additional factors associated with anticipated stigma.

Nine studies showed that WLHIV experienced HIV-stigma and discrimination from close family members such as husbands and in-laws, parents and siblings. WLHIV experienced blaming, verbal insults, avoidance and rejection from husband and in-laws (7, 16, 32). WLHIV also were accused by parents-in-law of transmitting HIV to their husbands and were expelled from their marital homes (8, 12, 32, 34). Husbands' occupation, a wider age gap between WLHIV and their husbands, and the women's lower household economic status, financial dependency on their husband and inability to engage in income generating activities were contributing factors associated with such discriminatory and stigmatising attitudes and behaviours (7). Women's inability to engage in income generating activities and the financial dependency on their husbands appeared to be an explanation for such negative attitudes and behaviours of husbands and in-laws towards them (20, 34). WLHIV also experienced stigma and discrimination from their own families including from parents and siblings. They were asked to leave home (32, 37), excluded from usual family activities including cooking, and their personal items (e.g., clothes and eating utensils) were separated from those of other family members (7, 8, 16, 20, 31).

Twelve studies reported HIV-stigma and discrimination against WLHIV by friends, neighbours and other community members (5, 7, 8, 12, 13, 19, 20, 31, 32, 34, 35, 37). Social isolation (e.g., refused entry/excluded from social functions or removed from public establishments) (8, 13, 37), refusal of neighbours and relatives to share food and drinks (20, 31), having personal possessions burned by friends and relatives, and eviction from rental properties (12) due to the fear of contracting HIV through social contacts, were some discrimination incidents that WLHIV faced within communities. WLHIV also experienced physical assaults, negative labelling using discriminatory words such as "HIV carriers" or "she is (HIV) positive", and harassments by other community members (8, 32, 34).

Similarly, within health care settings, WLHIV experienced a range of discriminatory treatments or behaviours by healthcare professionals due to limited knowledge about HIV and fear of contracting HIV (5, 8, 13, 16, 34, 35). Health professionals exerted the HIV-stigma and discrimination towards WLHIV in a form of criticising, blaming, shouting at, throwing health records in their face (5, 34, 35), avoiding physical contact with them (34, 35), refusing to provide healthcare services or leaving them untreated (5, 8, 13, 16, 34, 35), and unnecessary referrals (16, 35). Coercion to undergo HIV testing, termination of pregnancy, sterilisation, and termination or loss of private health



insurance, after HIV diagnosis, were other instances of healthcare-related discrimination against WLHIV (8). As a consequence, WLHIV chose not to disclose their HIV status and would go untreated (34, 35), often leading to advanced stage of HIV infection.

Stigma and discrimination towards WLHIV also occurred within the workplace settings, manifesting in the loss of prospects for promotion and unexplained changes in job descriptions due to employers worrying that customers may avoid using the services provided by WLHIV (8, 37).

#### 3.2.3.2. Stigma and discrimination against HIV-affected family members

Five studies reported that husbands and children of WLHIV, who were HIV-negative, also experienced stigma and discrimination from relatives and other community members (6, 19, 25, 31, 34). For example, husbands' relatives sterilised (by boiling) utensils (e.g., bowls and chopsticks) that had been used by the women's husband and children before they could use these themselves due to the fear of contracting HIV, stemming from a lack of HIV knowledge (34). Children of WLHIV were also negatively affected by their mother's HIV-positive status.

#### 3.2.3.3. Impacts of mothers' HIV status on children's social life and education

Seven studies indicated that children of WLHIV experienced social and educational challenges (8, 19, 20, 25, 31, 39, 41). Children of WLHIV often faced stigma and discrimination, such as being rejected, teased or mocked by their friends and significant others due to their mothers being diagnosed with HIV infection. For example, they were told "your mother has HIV", called "little HIVer" by friends (19, 25) and placed at a separate desk by teachers, while other children were told not to play with them at school and within community where they lived (31, 41). Two studies reported that because of their mother's regular illness, children of WLHIV had additional household responsibilities including undertaking household chores and taking care of their sick mothers (20, 39). These additional responsibilities prevented children from activities such as socialising with friends, being involved in extracurricular school or peer activities and doing school homework (20). Mothers' poor health condition due to HIV infection also influenced children's education through missing school and poor availability of essential provisions such as food and school fees, leading to children's poor educational performance and/or outcomes (19). In one study, children of WLHIV were denied school admission or expelled from school due to pressure or complaints from the parents of other students, who feared HIV transmission to their children (8).

#### 3.2.3.4. Family separation and child-parent conflicts

Forced removal of children by in-laws due to a mother's HIV diagnosis was another social impact of HIV on HIV-affected families (8, 20, 34). WLHIV also reported voluntarily sending their children to live with their siblings or sisters-in-law/ brothers-in-law's family, once they were terminally ill or hospitalised (9). The main reason for such separations was due to the fear of in-laws about mother-to-child transmission and the mothers' inability to raise their children due to poor physical health and economic conditions (9, 19). Husband-wife separation or abandonment by a husband or partner was another negative impact of HIV on the families of WLHIV (8, 19, 37), making it hard for women to take care of themselves and their children (37). A diagnosis of HIV in mothers also brought conflicts to parent-child relationships (39), and in some instances, children blamed their fathers as the source of their mothers' HIV infection (25). This all would likely be worse if the children were HIV-infected themselves (39).

#### 3.2.4. Economic impact of HIV on WLHIV and their families

Six studies reported that HIV infection had negative economic impact on WLHIV at individual and family levels, through several mechanisms. For example, a loss of job or potential work due to women's HIV status (8, 37) and poor physical strength (9, 37) were reported to prevent them from working, affecting their economic situation. HIV diagnosis negatively influenced women's willingness to apply for jobs that required HIV testing (20) and led to women losing financial support from their spouse and other family members (8).

HIV impact at a family level included the reduction in family income due loss of job or unemployment and women’s inability to work (20), and in some cases clients or customers stopped using the family business services after learning about the HIV status of women in the family (34), severely impacting the family business. An HIV diagnosis in women can also increase family healthcare expenses (9, 37), necessitate forced sale of family properties (including land and houses) to cover healthcare and living expenses (9, 19), putting additional economic strain on families. This leaves the family in a vicious cycle of disadvantages including food insecurity and poverty (9, 19). Table 2 below summarises the qualitative evidence of the impacts of HIV on WLHIV and their families.

**Table 2.** Qualitative evidence of the impact of HIV on WLHIV and their families.

| CATEGORY                                                                                                                                      | SELECTED QUOTES                                                                                                                                                                                                                                                                                                                                                                                                                                                                                                                                                                                                                                                                                                                                                                                                                                                                                                                                                                                                                                                                                                                                                                                                                                                    |
|-----------------------------------------------------------------------------------------------------------------------------------------------|--------------------------------------------------------------------------------------------------------------------------------------------------------------------------------------------------------------------------------------------------------------------------------------------------------------------------------------------------------------------------------------------------------------------------------------------------------------------------------------------------------------------------------------------------------------------------------------------------------------------------------------------------------------------------------------------------------------------------------------------------------------------------------------------------------------------------------------------------------------------------------------------------------------------------------------------------------------------------------------------------------------------------------------------------------------------------------------------------------------------------------------------------------------------------------------------------------------------------------------------------------------------|
| <b>PSYCHOLOGICAL IMPACT OF HIV ON WLHIV AND THEIR FAMILIES</b>                                                                                |                                                                                                                                                                                                                                                                                                                                                                                                                                                                                                                                                                                                                                                                                                                                                                                                                                                                                                                                                                                                                                                                                                                                                                                                                                                                    |
| <p>Psychological impact on WLHIV</p> <ul style="list-style-type: none"> <li>Distress and fear related to maternal and child health</li> </ul> | <p>"I felt bad, I was thinking; and I was like I am sick [HIV positive], then the child is also sick [HIV positive] .... the thoughts were many. .... Thinking about my child and how long she will take these tablets [ARVS]. When and how will she grow when she is on these tablets [ARVs]? " <i>Participant, Uganda</i> (5).</p> <p>"The patient developed a severe rash, however, the extremity of her paranoia at that time meant that she remained at home for fear that others may recognise this as a symptom of ‘the slim’ (local slang for HIV). She became progressively more paranoid, .... she also experienced panic attacks" <i>Participant, Uganda</i> (12).</p> <p>"I fear my child will be infected with HIV. We are HIV positive and of course there is a high probability for the child of getting infected" <i>Participant, Vietnam</i> (6).</p> <p>'My child’s health is not very good. And I fear to take him for the test...cos I don’t want to put on myself that situation.' <i>Participant, Uganda</i>, (37).</p>                                                                                                                                                                                                                      |
| <ul style="list-style-type: none"> <li>Worry, stress and anxiety related to the care for the child and child future</li> </ul>                | <p>"My husband and I fear that we will die early on, when the child is two or three years old only. .... The child who is an orphan will suffer great misery. It will die soon. How will my child live? I cannot imagine what it will be like, I only know that we will be in great misery too." <i>Participant, Vietnam</i> (6).</p> <p>"I thought I would have no strength to educate him [her son] because I would be helpless and not be able to work for myself because of HIV. I was also thinking that if I fall sick I will no longer be strong enough to work for him, get food to feed him, and he would eventually die". <i>Participant, Uganda</i> (5).</p> <p>"The patient suffered from a number of symptoms of depression, although she had not yet received a diagnosis. These symptoms included anxiety, insomnia, panic attacks, poor concentration, low mood and feelings of hopelessness and worthlessness" <i>Participant, Uganda</i> (12).</p> <p>"I was so scared that, now my baby is sick and if they tell me that he is sick, what will I do? I kept thinking, now will I look after him; put him in school knowing that he will die. Now what if I die and am buried who will ever look after him?" <i>Participant, Uganda</i> (5).</p> |

|                                                                                                                                                                                                           |                                                                                                                                                                                                                                                                                                                                                                                                                                                                                                                                                                                                                                                                                                                                                                                                                                                                                                                                                                                                                                                                                                                                                                                                                                                                                                                                                                                                                                                                                                                                                                                                                                                                                                                                                                                                                                              |
|-----------------------------------------------------------------------------------------------------------------------------------------------------------------------------------------------------------|----------------------------------------------------------------------------------------------------------------------------------------------------------------------------------------------------------------------------------------------------------------------------------------------------------------------------------------------------------------------------------------------------------------------------------------------------------------------------------------------------------------------------------------------------------------------------------------------------------------------------------------------------------------------------------------------------------------------------------------------------------------------------------------------------------------------------------------------------------------------------------------------------------------------------------------------------------------------------------------------------------------------------------------------------------------------------------------------------------------------------------------------------------------------------------------------------------------------------------------------------------------------------------------------------------------------------------------------------------------------------------------------------------------------------------------------------------------------------------------------------------------------------------------------------------------------------------------------------------------------------------------------------------------------------------------------------------------------------------------------------------------------------------------------------------------------------------------------|
| <ul style="list-style-type: none"> <li>Feeling sad, bad and embarrassed</li> </ul> <p><b>Psychological impact on families:</b></p> <ul style="list-style-type: none"> <li>On children of WLHIV</li> </ul> | <p>'...the relatives of my husband and on my side are not the people I think I'll leave with my son if at all I die. So I'm worried how really I'll leave him...I don't know how my son will live.' <i>Participant, Uganda (37).</i></p> <p>"Yes, madam, every day I am very sad about myself. Because we cannot move freely with everyone, like regular people... At that time [when I was first diagnosed], I felt very bad about myself. I thought, 'Why should I live this life?' ...." <i>Participant, India (16).</i></p> <p>"I felt people didn't want to talk to me because I had this disease. I felt embarrassed when I was walking on the street because I used to look so ugly. I was 27 and my weight was 27 kg [60 pounds]. My hair color was black, but I had lost all my hair and looked like a beggar. I felt that people would be afraid of me when they saw me. It was difficult for me to leave the house. I used to leave the house only once a month, to pick up my medication. It was like this for two years..." <i>Participant, India (16).</i></p> <p>"I can't go to the beauty shop. It makes me feel sad and rejected. ... I can talk to my friend when I am sad or hopeless" <i>Participant, Thailand (31).</i></p> <p>"When I told him [about HIV status] he cried and said that he is going to lose his mother." <i>Participant, Haiti (25).</i></p> <p>"When I told her that (I had HIV), she became sad in front of me. You understand? Then I saw tears coming out of my eyes." <i>Participant, Haiti (25).</i></p> <p>"He [her son] would be studying and then he would stop and start to think. I would ask him what is wrong with him. 'He said it is because he sees that I am sick and I am going to die. He won't have anyone to help him. That makes him sad.'" <i>Participant, Haiti (19).</i></p> |
| <p><b>PHYSICAL HEALTH IMPACT OF HIV ON WLHIV</b></p>                                                                                                                                                      |                                                                                                                                                                                                                                                                                                                                                                                                                                                                                                                                                                                                                                                                                                                                                                                                                                                                                                                                                                                                                                                                                                                                                                                                                                                                                                                                                                                                                                                                                                                                                                                                                                                                                                                                                                                                                                              |
| <p><b>Poor physical health of WLHIV leads to inability to work and take care of the children</b></p>                                                                                                      | <p>"I did not feel anything wrong with my body. It is now I have a problem because I don't feel my strength at all [due to HIV illness]. .... Yes, there are times I feel like I cannot take care of them [her children]. I would wake up in the morning and would not feel any strength so I would stay in bed." <i>Participant, Haiti (19).</i></p> <p>"It is only my mom.... She is the one who takes care of me and my children [She was ill and very weak physically and could not work to earn income to support her life and her children]." <i>Participant, Haiti (19).</i></p> <p>"When I went to work at the factory, I felt dizzy, getting more and more exhausted. It is more difficult than before, as my husband didn't work anymore as a teacher, he now is working as a construction worker. He lost his memory." <i>Participant, Cambodia (9).</i></p> <p>"The most disturbing problem affecting me is the burning...it burns as if like fire. I don't sleep. At first it was the hands and shoulders...now it is the whole body." <i>Participant, Uganda (37).</i></p>                                                                                                                                                                                                                                                                                                                                                                                                                                                                                                                                                                                                                                                                                                                                                     |
| <p><b>INTIMATE PARTNER VIOLENCE AGAINST WLHIV</b></p>                                                                                                                                                     |                                                                                                                                                                                                                                                                                                                                                                                                                                                                                                                                                                                                                                                                                                                                                                                                                                                                                                                                                                                                                                                                                                                                                                                                                                                                                                                                                                                                                                                                                                                                                                                                                                                                                                                                                                                                                                              |
| <p><b>Intimate partner violence against WLHIV</b></p>                                                                                                                                                     | <p>"After giving birth he started treating me badly he knew that he had finished me off because he had already infected me with HIV. I no longer had anywhere to go. He stopped me from working and stopped me from coming to hospital to pick my</p>                                                                                                                                                                                                                                                                                                                                                                                                                                                                                                                                                                                                                                                                                                                                                                                                                                                                                                                                                                                                                                                                                                                                                                                                                                                                                                                                                                                                                                                                                                                                                                                        |

|                                                                                                                                                                                                                  |                                                                                                                                                                                                                                                                                                                                                                                                                                                                                                                                                                                                                                                                                                                                                                                                                                                                                                                                                                                                                                                                                                                                                                                                                                                                                                                                                                                                                                                                                                                                                   |
|------------------------------------------------------------------------------------------------------------------------------------------------------------------------------------------------------------------|---------------------------------------------------------------------------------------------------------------------------------------------------------------------------------------------------------------------------------------------------------------------------------------------------------------------------------------------------------------------------------------------------------------------------------------------------------------------------------------------------------------------------------------------------------------------------------------------------------------------------------------------------------------------------------------------------------------------------------------------------------------------------------------------------------------------------------------------------------------------------------------------------------------------------------------------------------------------------------------------------------------------------------------------------------------------------------------------------------------------------------------------------------------------------------------------------------------------------------------------------------------------------------------------------------------------------------------------------------------------------------------------------------------------------------------------------------------------------------------------------------------------------------------------------|
|                                                                                                                                                                                                                  | <p>medications [ARVs]". <i>Participant, Uganda</i> (5).</p> <p>"He said that he would do badly to me until I died. And he also said, "I won't go anywhere, I will treat you badly until you die. .... " <i>Participant, Cambodia</i> (9).</p> <p>[He] hit on my arms, and scratched my eyes, boxing and slapping, and hit my head, so my head was cut. Never stitches after he hit my head, kept it like that. People asked me to divorce, but I did not. Since I have tolerated it from that time, I don't want to divorce. I agree, even alive or dying, we are patients to live with each other like this; Hmm, how often he did like this... too many times, that is, I can't count, almost every day. When he beat our kid's head heavily that nearly burst the kid's brain. He beat her badly." <i>Participant, Cambodia</i> (9).</p>                                                                                                                                                                                                                                                                                                                                                                                                                                                                                                                                                                                                                                                                                                       |
| <p><b>SOCIAL IMPACT OF HIV ON WLHIV AND THEIR FAMILIES</b></p>                                                                                                                                                   |                                                                                                                                                                                                                                                                                                                                                                                                                                                                                                                                                                                                                                                                                                                                                                                                                                                                                                                                                                                                                                                                                                                                                                                                                                                                                                                                                                                                                                                                                                                                                   |
| <p><b>Anticipated stigma and discrimination among WLHIV</b></p>                                                                                                                                                  | <p>"Well, I was afraid that they would dislike me because some people heard or saw the news about HIV and understood it while some people didn't...I didn't know which of them would accept it and I didn't want to be bothered by it, so I didn't tell and that was it" <i>Participants, Thailand</i> (33).</p> <p>"I have not told anyone at work that I'm HIV positive for fear I might lose my job. Because I am afraid that if I tell them that I have HIV, they will remove me from my job. That's why I did not tell anyone... People would not touch me [if they knew I was HIV-positive]. And they would not even talk in close proximity to an HIV-positive person... They were afraid that if they touch me, they would also get the disease." <i>Participants, India</i> (16).</p> <p>"I thought people would think badly about me, they would say she doesn't have a husband. She must have done wrong things. That's the reason she got this. And I thought they would hate me. Because of this fear, I did not tell them. People in the community think that people who are HIV positive made bad choices and that is the reason they are HIV positive" <i>Participants, India</i> (16).</p> <p>"I have only told my sister and my brother-in-law. Some people have awareness and some people do not. If I tell people that I am HIV positive, people will look at us like we are cheap, and they will think I am a street lady [sex worker]. Because of this reason, I do not tell everyone" <i>Participants, India</i> (16).</p> |
| <p><b>External stigma and discrimination against WLHIV</b></p> <ul style="list-style-type: none"> <li>• From family members <ul style="list-style-type: none"> <li>○ Siblings and parents</li> </ul> </li> </ul> | <p>"Don't cook for us anymore and don't use our utensils." <i>Participant, Thailand</i> (31).</p> <p>"Don't tell anyone about your disease. People who get AIDS will die soon. Our society doesn't like AIDS." <i>Participant, Thailand</i> (31).</p> <p>"My father told me to get out of the house. .... For four years, I stayed with my family, in a room. Nobody touched me and nobody talked to me for four years." <i>Participant, India</i> (32).</p> <p>"My mother treated me differently. When I was released from Gandhi Hospital, my parents took me back to their house. One day my mother gave me rice to eat, then my brother's daughter asked me to feed her. When I was feeding her [with my hands], my mother came and said, "Why are you feeding her your rice?" She said that she would feed her herself. I told my mother that I had not already eaten from the same plate, and that is why I was feeding her. Otherwise, I would not</p>                                                                                                                                                                                                                                                                                                                                                                                                                                                                                                                                                                                     |

|                                                                                                             |                                                                                                                                                                                                                                                                                                                                                                                                                                                                                                                                                                                                                                                                                                                                                                                                                                                                                                                          |
|-------------------------------------------------------------------------------------------------------------|--------------------------------------------------------------------------------------------------------------------------------------------------------------------------------------------------------------------------------------------------------------------------------------------------------------------------------------------------------------------------------------------------------------------------------------------------------------------------------------------------------------------------------------------------------------------------------------------------------------------------------------------------------------------------------------------------------------------------------------------------------------------------------------------------------------------------------------------------------------------------------------------------------------------------|
|                                                                                                             | <p>feed her... Sometimes I think that because of my HIV status and my husband's death, I have lots of problems and I often get fed up with my life. But I have to be alive for my children. I feel sad that everyone is happy, but I am unable to be happy with them... My mother's sister also has the same feelings towards me. She told my family members to keep my plate, glass, soap—everything—separate. She would say, "Why you are always allowing her to be with you people?" I have suffered a lot this way" <i>Participant, India</i> (16).</p> <p>"I have been treated differently by my sister. She did not say anything directly, but her behavior changed. She stores our clothes separate from hers. I have been living with HIV for nine years..." <i>Participant, India</i> (16).</p>                                                                                                                 |
| <ul style="list-style-type: none"> <li>○ From parents-in-law and sisters-in-law</li> </ul>                  | <p>"Since my husband died and I cannot work to provide food for my family-in-law, they treat me with a cold heart. I cannot live there anymore. My mother-in-law sold the house that my husband and I built because it was not yet registered in our names." <i>Participant, India</i> (34).</p> <p>"Not only did they blame me, they started beating me! And a few days later, they threw me out of the house. They said 'You do not have good character so you go away". <i>Participant, India</i> (32).</p> <p>"After the death of her husband, the patient was forced to leave their family home. With her HIV status now more widely known among the villagers, the reputation of her former husband's family was at risk." <i>Participant, Uganda</i> (12).</p>                                                                                                                                                    |
| <ul style="list-style-type: none"> <li>● From community members (friends, relatives, neighbours)</li> </ul> | <p>"Now I don't feel comfortable with the people in my community who criticize me. Whenever I talk to them, they say that 'you are a sick person" <i>Participant, Haiti</i> (19).</p> <p>"Everyone in the neighborhood knows. Stigma is big. My mother-in-law doesn't care about me, only about my baby. Neighbors visited out of curiosity. Some kept a distance, used bad words, and asked, "How could an HIV-infected person become a parent?" <i>Participant, India</i> (34).</p> <p>"The food seller did not want to sell food to me with her bowl and asked me to go home and take my bowl, because she was afraid that I would sit there and affect her customers." <i>Participant, India</i> (34).</p> <p>'...people were fearing me, no-one would even come to see me...I was just neglected...by even the clan, even my relatives, even my friends. I was just alone..." <i>Participants, Uganda</i> (37).</p> |
| <ul style="list-style-type: none"> <li>● From healthcare professionals</li> </ul>                           | <p>"Sometimes when you get to the facility and they look at your documents and they realize you are infected [HIV+], they do not handle you". <i>Participant, Uganda</i> (5).</p> <p>"The doctors treated me well when they didn't know my status. But right after my delivery they found that I was infected, and then they became rude. They did not tie the umbilical cord immediately. I was in so much pain". <i>Participant, India</i> (34).</p> <p>"When they knew my HIV status, they shouted at me and did not allow me to sit, even when I was bleeding and weak. They asked other patients to keep away from me. Then they transferred me to a special room. When I gave birth, there was no staff with me." <i>Participant, India</i> (34).</p>                                                                                                                                                              |

|                                                                                                                  |                                                                                                                                                                                                                                                                                                                                                                                                                                                                                                                                                                                                                                                                                                                                                                                                                                                  |
|------------------------------------------------------------------------------------------------------------------|--------------------------------------------------------------------------------------------------------------------------------------------------------------------------------------------------------------------------------------------------------------------------------------------------------------------------------------------------------------------------------------------------------------------------------------------------------------------------------------------------------------------------------------------------------------------------------------------------------------------------------------------------------------------------------------------------------------------------------------------------------------------------------------------------------------------------------------------------|
| <p><b>Stigma and discrimination against HIV-affected family members</b></p>                                      | <p>“The ANM and staff nurse threw the records on my face and asked me to go to JIPMER for delivery. During that time my membranes ruptured. So I went to JIPMER, throwing my records (in frustration) and delivered there without disclosing my HIV status.” <i>Participant, India</i> (35).</p> <p>“[At the government hospital] we are treated differently, compared with normal people. We are kept away. And when they prescribe us medicine, they do so without touching us” <i>Participant, India</i> (16).</p>                                                                                                                                                                                                                                                                                                                            |
| <ul style="list-style-type: none"> <li>• Against HIV-affected family members as a whole</li> </ul>               | <p>“The day after I learned of my HIV-positive status, my younger sister-in-law escorted all our other family members to go to VCT [voluntary counselling and testing] to get blood tests. She boiled all our bowls and chopsticks. After that, she sold her house and moved away; she doesn’t want to live with my husband and me.” <i>Participants, India</i> (20).</p> <p>“People do not join us in eating and they discriminate against my children.” <i>Participant, Thailand</i> (31).</p>                                                                                                                                                                                                                                                                                                                                                 |
| <ul style="list-style-type: none"> <li>• Against children of WLHIV by other children within community</li> </ul> | <p>“My neighbour would not let her child play with my daughter.” <i>Woman participant, Thailand</i> (31).</p> <p>“He [her son] always says that what makes him sad is that if a child is talking to him and they tell him that [your mother has HIV]. When he was younger if a child cursed him he would come and ask me if I was really sick and tell me that the kids are cursing at him. Now, the way it affects him is that there are times the children curse him saying ‘look at you <i>ti sidayis</i> (little HIVer) -- your mother has HIV.” <i>Participant, Haiti</i> (19).</p> <p>“They were teasing him, telling him that his mother is sick.” <i>Participant, Haiti</i> (25).</p> <p>“He tells me that what makes him sad is that sometimes other children tell him that (your parent has HIV).” <i>Participant, Haiti</i> (25).</p> |
| <ul style="list-style-type: none"> <li>• Against children by other children and teachers at school</li> </ul>    | <p>“Also, what creates another little problem is that when she goes to school. Every time she has a dispute with the students in the school they always humiliate her. They tell her, ‘Don’t you see that your mother has HIV?’ and she always comes and tells me that.” <i>Participant, Haiti</i> (25).</p> <p>“Last year my son was at the second grade. He was often sick and had to go to hospital. The teacher told the other children not to play with him because he was sick. He was also isolated from his friends because the teacher placed him at a separate desk. I must stand this discrimination and still let my son go to school. I always warn him not to play with his classmates and not to scratch or bite them” <i>Participant, Vietnam</i> (6).</p>                                                                       |
| <p><b>Impact of HIV diagnosis in mothers on children’ education</b></p>                                          | <p>“When I was very sick I was bedridden for 4 years, he [her son] spent the 4 years without going school. My other son was going to the 12th grade, he lost 4 years as well and was not able to go to class.” <i>Participant, Haiti</i> (19).</p> <p>“When I was sick she [her daughter] spent two years without going to school...The only times now she goes to school and comes back early is when she goes without food. .... There are days she goes to school without eating. If she arrives in class after taking her HIV medication without eating, she doesn’t feel like she can stay,</p>                                                                                                                                                                                                                                             |

|                                                                                                                                                                                                                        |                                                                                                                                                                                                                                                                                                                                                                                                                                                                                                                                                                                                                                                                                                                                                                                                                                                                                                                                                                                                                                                                                                                                                                                                                                                                                                                                                                                                                                                                                                                                                                                                                                                                                                                                                                                                                                                                                                                   |
|------------------------------------------------------------------------------------------------------------------------------------------------------------------------------------------------------------------------|-------------------------------------------------------------------------------------------------------------------------------------------------------------------------------------------------------------------------------------------------------------------------------------------------------------------------------------------------------------------------------------------------------------------------------------------------------------------------------------------------------------------------------------------------------------------------------------------------------------------------------------------------------------------------------------------------------------------------------------------------------------------------------------------------------------------------------------------------------------------------------------------------------------------------------------------------------------------------------------------------------------------------------------------------------------------------------------------------------------------------------------------------------------------------------------------------------------------------------------------------------------------------------------------------------------------------------------------------------------------------------------------------------------------------------------------------------------------------------------------------------------------------------------------------------------------------------------------------------------------------------------------------------------------------------------------------------------------------------------------------------------------------------------------------------------------------------------------------------------------------------------------------------------------|
| <p><b>Family separation</b></p> <ul style="list-style-type: none"> <li>• Due to the sickness of the mothers and to get safe life/better home for children with other family</li> <li>• Abandoned by husband</li> </ul> | <p>so she comes back home." <i>Participant, Haiti</i> (19).</p> <p>"He [her son] started missing school because I did not have the opportunity to send him. I lost what I had because I sold all I had for the illness and for the older children. This makes him suffer because he cannot go to school." <i>Participant, Haiti</i> (19).</p> <p>"Yes, there are changes in the way he learned. He failed one semester. He would be studying and then he would stop and start to think. I would ask him what is wrong with him. 'He said it is because he sees that I am sick and I am going to die. He won't have anyone to help him. That makes him sad." <i>Participant, Haiti</i> (19).</p> <p>"I had 9 children, but 2 are already dead. I still have 7 children, but only 2 stay with me. When we [she and her husband] were seriously sick, we gave away our children, one to my sister-in-law, one to my sibling. I was at hospital for 8 months. I thought that I was about to die, so all my relatives took my children, one for each" . <i>Participant, Cambodia</i> (9).</p> <p>"Children are at the district and living with my brother in-law there" <i>Participant, Cambodia</i> (9).</p> <p>"I was preparing to kill all of my children, because my husband left me with nine children. I had even bought clothes, a roll [of barkcloth] to bury the children" <i>Participants, Uganda</i> (37).</p>                                                                                                                                                                                                                                                                                                                                                                                                                                                                                              |
| <p><b>ECONOMIC IMPACT OF HIV ON WLHIV AND THEIR FAMILIES</b></p>                                                                                                                                                       |                                                                                                                                                                                                                                                                                                                                                                                                                                                                                                                                                                                                                                                                                                                                                                                                                                                                                                                                                                                                                                                                                                                                                                                                                                                                                                                                                                                                                                                                                                                                                                                                                                                                                                                                                                                                                                                                                                                   |
| <ul style="list-style-type: none"> <li>• WLHIV lose jobs</li> <li>• Family experience food insecurity, hunger, and poverty</li> <li>• Increased family health-related expenditure</li> </ul>                           | <p>"It [infected with HIV] resulted in a lot of problems also because I lost my job and could not work." <i>Participant, Haiti</i> (19).</p> <p>"Sometimes they fear me...they fear even coming here to make the hair...they say "that one is HIV — you may go there, she may do your hair and she can put you the blood in your hair and even you fall sick" <i>Participant, Uganda</i> (37).</p> <p>"My family used to make billboards and signs for shops, but when the ward found out I was HIV positive, the clients stopped coming. We had to close the store. Now we make money by packing baby clothes in boxes at home." <i>Participant, India</i> (34).</p> <p>"I qualified after I was sickly, so I was not posted as a teacher...how can a teacher work today, for tomorrow you are down." <i>Participant, Uganda</i> (37).</p> <p>"It [HIV illness] affects him a lot. For example, when I do not have food [because she felt weak due to HIV illness and could not work] to give him [her son] I go to my mother's. If my mother has food then I give him some. If she doesn't have food then I am left without food [to give my son]. <i>Participant, Haiti</i> (19).</p> <p>"The virus put my family in poverty in the first place. brought poverty in the first place. It is more difficult than before. Poor, nowadays we are poor. Before we had enough to eat, but now, we didn't have enough." <i>Participant, Cambodia</i> (9).</p> <p>"At times we [WLWH] meet financial problems. For example when you are supposed to come and get more drugs [ARVs] you find that you do not have money for transport. You go to a friend to borrow money and you find that she does not have it. So you exceed your appointment dates for a week or more. And when you come to collect your drugs the doctors do not treat you well. That also makes us feel bad." <i>Participant, Uganda</i> (5).</p> |

|                                                                                |                                                                                                                                                                                                                                                                                                                                                                                                                                                                                                                                                                                                                                                                                                                                                                                                                                                                                                                                                                                                                                                                                                                                                                                                                                                                                                                                                                                            |
|--------------------------------------------------------------------------------|--------------------------------------------------------------------------------------------------------------------------------------------------------------------------------------------------------------------------------------------------------------------------------------------------------------------------------------------------------------------------------------------------------------------------------------------------------------------------------------------------------------------------------------------------------------------------------------------------------------------------------------------------------------------------------------------------------------------------------------------------------------------------------------------------------------------------------------------------------------------------------------------------------------------------------------------------------------------------------------------------------------------------------------------------------------------------------------------------------------------------------------------------------------------------------------------------------------------------------------------------------------------------------------------------------------------------------------------------------------------------------------------|
| <ul style="list-style-type: none"> <li>Selling of family properties</li> </ul> | <p>“When we did not have the virus, we do not need to spend much money. We can have some money left from our little money. Now we come to hospital every month and we spend almost 100,000 riel [\$25 USD] for three people [every month]. <i>Participant, Cambodia (9)</i>.</p> <p>“For example, if we earned \$10 USD from rice harvest, we paid \$3-\$4 for food and kept \$6-\$7. But now it all goes for medicine, nothing left. I work every day only for medicine. We get monthly salary to pay for spending. My husband gets drug [one time] then I get the drug, we take turns”. <i>Participant, Cambodia (9)</i>.</p> <p>“I sold my land and everything [for her treatment]. Nowadays I borrow my father’s land to live [on]. I have nothing. I am very poor and have no money” <i>Woman participant (participant no. 15), 30 years old, Cambodia (9)</i>.</p> <p>“Nothing [was] left, house and other things were all sold [to cover healthcare expenses for herself and her husband]” <i>Participant, Cambodia (9)</i>.</p> <p>“They [her family members] suspected that the neighbour has bewitched him [her husband]...they took him to the witch doctor...they sold everything ...sold everything for his treatment. Then the man died...he died (whispered). Then I had lost everything, I was jobless, I had no home, just renting.” <i>Participant, Uganda (37)</i>.</p> |
|--------------------------------------------------------------------------------|--------------------------------------------------------------------------------------------------------------------------------------------------------------------------------------------------------------------------------------------------------------------------------------------------------------------------------------------------------------------------------------------------------------------------------------------------------------------------------------------------------------------------------------------------------------------------------------------------------------------------------------------------------------------------------------------------------------------------------------------------------------------------------------------------------------------------------------------------------------------------------------------------------------------------------------------------------------------------------------------------------------------------------------------------------------------------------------------------------------------------------------------------------------------------------------------------------------------------------------------------------------------------------------------------------------------------------------------------------------------------------------------|

## 4. Discussion

### 4.1. Summary of findings

The primary objective of this review was to understand the impact of HIV on WLHIV and their families in LMICs. A total of 22 studies comprising of nine quantitative and 13 qualitative studies were included in this review. Six quantitative (7, 11, 13, 30, 36, 38) and four qualitative studies (5, 12, 32, 35) focused on exploring the impact of HIV on WLHIV, while two quantitative (8, 20) and six qualitative (6, 9, 19, 31, 34, 37) studies looked at the impact on WLHIV and their families. One quantitative (39) and qualitative (25) study each only investigated the impact on families of WLHIV.

Psychological challenges faced by WLHIV were presented in five quantitative studies (11, 20, 30, 36, 38), six qualitative studies (5, 6, 12, 16, 31, 37), while two qualitative studies also reported psychological impact on the women’s children (25) and on both the women and their children (19). Poor physical health impact on WLHIV (9, 19, 37) and IPV against them following HIV diagnosis (5, 9) were reported in these qualitative studies. Negative social consequences of an HIV diagnosis in women, such as stigma and discrimination against them within family, community, workplace and healthcare settings were reported in six quantitative studies (7, 8, 13, 20, 36, 38), and 10 qualitative studies (5, 6, 9, 12, 19, 31, 32, 34, 35, 37), while stigma and discrimination towards their family members, especially children within family, community, healthcare and school settings were reported in five qualitative studies (6, 19, 25, 31, 34). Other negative social consequences on the women’s families, such as family separation, child-parent conflict, HIV impact on children’s education and social life were reported in two qualitative (9, 19) and three quantitative (8, 20, 39) studies. Negative economic impact experienced by WLHIV (37) and their families (9, 19, 34, 37) were presented in five qualitative studies. One quantitative study also reported economic impact on family of WLHIV (20).

### 4.2. An explanatory conceptual model for the impact of HIV on WLHIV and their families

Two levels of HIV impact were identified: the impact on WLHIV at an individual level and on families affected by the women’s HIV diagnosis. Drawing on the reviewed studies and the conceptual framework for the socio-economic impact of the HIV/AIDS epidemic on households (42), an explanatory Conceptual Model for HIV impact on WLHIV and their families was developed to visually represent the connection between the emerging themes (see Figure. 2).

The Model demonstrates that HIV infection results in a range of negative consequences at the individual and familial level. At the individual level, HIV infection causes psychological challenges



including depression, apprehension and anxiety on WLHIV (11, 12, 43), often triggered by concerns that the women may face after being diagnosed with HIV. These may include concerns about their poor health condition, HIV status, stigma, discrimination, family shaming and the future of their children (11, 16, 30). Such concerns reflect psychological responses of WLHIV towards the knowledge about their HIV-positive status and the possibility of various negative consequences that may occur to themselves or their families (44). Similarly, HIV infection can cause psychological challenges on the women's families, especially children, such as feeling upset, hurt, sad and worried about the mother's poor health condition or HIV status (19, 25). HIV can also lead to poor physical strength which influences the ability of WLHIV to work and take care of themselves and their children effectively (9, 19, 37). This can lead to the women being dependent on the support from their extended families to fulfil their basic necessities and to take care of their children, which are often burdensome for families, especially the ones with limited resources (9, 19). Abuse of WLHIV in any forms (e.g., physical, verbal, sexual abuse) by significant others including husbands, partners and in-laws due to unacceptance of women's HIV status has been reported in many LMICs, further exacerbated by sociocultural and patriarchal systems and structures that require wives' submission to husbands or male partners (45-49). For example, in some cultures in Uganda, Zimbabwe, India and Cambodia, husbands are deemed to submit to husbands (46-50). Non-submission to husbands would result in sanctions, including beating, divorced, chased from home and not financially supported (46).

HIV infection can also lead to negative social impact, such as stigma and discrimination against WLHIV, reflected in a range of negative attitudes and behaviours towards them, including rejection, insults, avoidance and isolation, which may be imposed by family members, community members, healthcare professionals, and employers or colleagues (7, 12, 13). A diagnosis of HIV in women can also lead to courtesy stigma towards their family members, especially children, manifesting in rejection or negative treatments by their friends and significant others within communities or school settings (8, 19, 25, 31, 41, 51). Stigma and discrimination towards the women themselves and also their family, are often very damaging and in many cases lead to feelings of rejection, hopelessness, shame, anger, and fear (11, 12, 16, 20, 31). Notably, the lack of knowledge of HIV transmission and prevention that is reflected in the fear of acquiring HIV infection through interaction with PLHIV is one of the biggest sources of HIV stigma and discrimination (8, 15, 52). Stigma and discrimination towards WLHIV and their family seem to also reflect psychological response of non-infected people towards the knowledge about the existence of PLHIV around them, who may transmit the infection to them or threaten their health and life (17, 18, 44).

Denial of school admission and/or withdrawal of children from school due to mothers' inability to pay school fees and provide children's basic necessities, discrimination, and children's involvement in home duties due to poor health of WLHIV, are also serious social consequences of HIV on children of WLHIV (42, 53-55). Children of WLHIV are an at-risk population, they often miss out on crucial socialisation with friends and extracurricular activities due to increased responsibility at home (8, 19, 20). These are educational consequences that hinder opportunities for their future, but are often in conjunction with feeling upset, hurt and worried about their mother's poor health, and/or being subjected to discrimination (8, 19). These children are also at high risk of mental health issues, often without any sort of support in place (56, 57). Forced and voluntary family separations of child-parent or husband-wife, have also been reported, either due to poor physical health, inability of WLHIV to take care of their children, lack of support, or unacceptance of women's HIV status by husband or partner (8, 9, 19, 37). The lack of support and unacceptance of women HIV status, especially by people around them, such as families and friends, can lead to self-isolation, lack of access to health care and treatment services and inability to cope with various challenges facing them (11, 31, 58, 59).

Consistent with the constructs of the framework for the socio-economic impact of HIV/AIDS on households (42, 53, 60-62), reduced family income due to loss of employment of infected family members (WLHIV or their partners/other family members), or loss of a family business, in addition to increased family health expenditure, leads to economic or financial difficulties (8, 9, 37). These economic consequences may also lead to household food insecurity prompting decisions such as selling of family properties (e.g., land and houses), leading to a vicious cycle of poverty and cascade of disadvantage within HIV-affected families (60-63). This chain of economic consequences can further lead to deterioration of WLHIV's physical and psychological health (21-23).

#### 4.3. Implications for future practices or interventions

This systematic review summarises evidence on a range of HIV negative consequences on an entire family unit when a woman is diagnosed with HIV in a LMIC. It highlights psychological, physical, social and economic aspects that need to be addressed in future responses.

##### 4.3.1. Addressing stigma and discrimination against WLHIV and their children

HIV is a stigmatising infection, which varies according to culture and context (64). Many cultures associate HIV with immorality through an association of the disease with groups deemed 'deviant' from social norms, such as homosexual men, commercial sex workers and drug users (65). In this review, though not obvious that WLHIV were linked with any deviant behaviours, their experience of stigma and discrimination was within family, community, healthcare and workplace settings. Children of WLHIV were also stigmatised and discriminated against by their friends and teachers at school, and by other community members, just for being related to someone with HIV. These appeared to be influenced by people's assumption and fear that children of WLHIV could also be HIV-infected themselves and could transmit the infection to other children (17, 18, 44). To respond to HIV-stigma and discrimination effectively, interventions should target not only at individual or family levels, but also at community and societal levels, including family, community, school, healthcare and workplace settings.

HIV education and awareness of its transmission methods for population groups, families and community members would be a vital component of any intervention, seeking to raise awareness of HIV/AIDS as well as acceptance of WLHIV (66). The aim of this would be to reduce stigma and discrimination against WLHIV and allow their family and community to provide social support (66-68). The key stakeholders in the community would be critical in supporting any HIV intervention, allowing them to lead the community through the stages of the intervention (69). Their opinions and values matter (69). Similarly, educating and involving both PLHIV who have had their viral load suppressed and been open about their HIV status, and healthcare professionals who provide care to PLHIV, in the delivery of such an intervention would be equally important. They could reinforce the messaging regarding HIV transmission and safety measures to be adopted. Involvement of these people may bring stronger influence on community members and increase the likelihood of community members receiving the intervention, which can lead to better acceptance of WLHIV and other PLHIV in general and reduction or elimination of stigma and discrimination towards them within families, communities and other settings (70-73). Health systems interventions, such as intervention supporting HIV patient self-management and improving patient engagement in HIV care can also be useful strategies to build positive self-perceptions and confidentiality of WLHIV and to address stigma and discrimination against WLHIV (74, 75). These may also lead to reducing internalised stigma which often comes from negative self-perceptions, over worried and fear of other people's reactions.

##### 4.3.2. Addressing psychological challenges on WLHIV

Despite improvements in knowledge about HIV and increased access to HIV treatment and support across the world (1), an HIV diagnosis is still found to impose significant psychological challenges on WLHIV, manifested in a range of emotional responses, including sadness, apprehension and anxiety (1, 5, 16, 38). As such, interventions are needed that tackle psychological challenges faced by WLHIV and their families (76). Counselling, provided by a trained HIV-counsellor, could be a useful strategy where WLHIV could receive psychosocial support once they are diagnosed with HIV (77). Counselling, in its very nature involves sharing personal experiences and feelings, and therefore counselling services need to consider and account for sex, religious and cultural aspects or norms and values of WLHIV which may increase acceptance and access to the services (78, 79). Family counselling could be a great benefit for WLHIV as it can increase their understanding and acceptance of the infection, reduce stigma and improve treatment of WLHIV (68, 80, 81). Counselling is also reported to increase patients' adherence to ART which can improve their physical health condition (82). An additional strategy to support WLHIV would be to provide HIV

peer support groups, providing them with opportunities to share information, experiences, and gain support from others (70, 72, 73).

#### 4.3.3. Addressing economic impact of HIV on WLHIV and their families

To address the economic impact of on HIV on WLHIV and their families, some strategies that could be used are the provision of skill training based on WLHIV' interests and start-up capital for their own business, which have been reported elsewhere effective in supporting economic empowerment and reducing HIV vulnerability among PLHIV (83-86). The provision of training and start-up capital for WLHIV can be done in collaboration between government and other sectors such as NGOs that can provide continuous support, guidance and supervision. In addition, HIV interventions that consider a broader context of women's lives, including their responsibility for household and caring role within family are also recommended (83). Furthermore, there has to be free access to HIV-related healthcare services for WLHIV which would definitely reduce financial burden or expenses for health care (87, 88). It is also important that much more needs to be done, particularly in improving the quality and access of services to ease the burden of healthcare expenses through provision of free or subsidised health care insurance. An example of such strategy has been implemented in Indonesia, where PLHIV are equipped with health insurance provided by government, which enables them to have free access to healthcare services (89).

#### 4.4. Implication for future studies

None of the reviewed studies focused on psychological impact of HIV on HIV-affected family members of WLHIV, though some studies reported scant information related to psychological impact on children. Similarly, no studies reviewed looked at stigma and discrimination against family members other than children, nor explored the impact of women's HIV status on the employment of family members. The role that cultural and religious values, norms and thoughts play in exacerbating the impact of HIV on WLHIV and their families in LMICs was also a topic not covered. Also, none of the studies reviewed explored the impact of the women's HIV-positive status on their access to healthcare services or ART. Future studies that address all of the aspects are recommended in order to develop specific and effective interventions tailored to specific environment and settings, for both WLHIV and their family members. For example, findings of future studies that explore the impact of HIV on the women's access to ART can be used to improve HIV-related healthcare system, tailor HIV care service delivery to address the need of PLHIV and support their health and wellbeing.

#### 4.5. Limitation of the study

This review only included studies conducted in LMICs. Thus, evidence on the lived experiences of WLHIV in developed countries about the impact of HIV on themselves and their families was not covered in this review. To build a comprehensive picture of HIV impact facing WLHIV and their families, future literature reviews that include studies on this topic conducted in developed countries are also recommended. Another limitation is that this review included English peer review literature only, thus may have missed studies on this topic, which are reported in other languages.

### 5. Conclusions

The Conceptual Model shown in this review presents evidence that an HIV diagnosis brings a number of significant, persistent, and negative consequences for WLHIV and their families. This Model may assist in designing interventions that address psychological, physical, IPV, social and economic needs to ensure that WLHIV and their families have the best quality of life, and the support they need to thrive even in the face of a HIV diagnosis.

**Ethics approval and consent to participate:** Not applicable

**Data availability:** All data generated or analysed during this study are included in this published article

**Conflicts of interest:** Authors declared no conflict of interests

**Funding statement:** This study did not receive funding from any institutions

**Acknowledgments:** Not applicable

**Supplementary Materials:** Appendix 1: Full searching strategy by databases, Appendix 2: JBI Critical Appraisal instruments, Appendix 3: Assessment of methodological quality, PRISMA 2009 checklist: Preferred Reporting Items for Systematic Reviews and Meta-Analyses

## References

1. UNAIDS. UNAIDS data Geneva, Switzerland: Joint United Nations Programme on HIV/AIDS. Available at: [https://www.unaids.org/sites/default/files/media\\_asset/2020\\_aids-data-book\\_en.pdf](https://www.unaids.org/sites/default/files/media_asset/2020_aids-data-book_en.pdf); 2020.
2. UNAIDS. Global HIV & AIDS Statistics - Fact Sheet. Geneva, Switzerland: The Joint United Nations Programme on HIV/AIDS. Available at: <https://www.unaids.org/en/resources/fact-sheet>; 2021.
3. Songwathana P. Women and AIDS caregiving: women's work? *Health Care Women Int.* 2001;22(3):263-79.
4. Willie TC, Overstreet NM, Peasant C, Kershaw T, Sikkema KJ, Hansen NB. Anxiety and Depressive Symptoms Among People Living with HIV and Childhood Sexual Abuse: The Role of Shame and Posttraumatic Growth. *AIDS Behav.* 2016;20:1609–20.
5. Ashaba S, Kaida A, Coleman JN, Burns BF, Dunkley E, Kasey ON, et al. Psychosocial challenges facing women living with HIV during the perinatal period in rural Uganda. *PLoS One.* 2017;12(5):1-5.
6. Chi BK, Hanh NT, Rasch V, Gammeltoft T. Induced abortion among HIV-positive women in Northern Vietnam: exploring reproductive dilemmas. *Culture, Health & Sexuality.* 2010;12:S41-54.
7. Halli SS, Khan CGH, Moses S, Blanchard J, Washington R, Shah I, et al. Family and community level stigma and discrimination among women living with HIV/AIDS in a high HIV prevalence district of India. *Journal of HIV/AIDS & Social Services.* 2017;16(1):4-19.
8. Paxton S, Gonzales G, Uppakaew K, Abraham KK, Okta S, Green C, et al. AIDS-related discrimination in Asia. *AIDS Care.* 2005;17(4):413-24.
9. Yang Y, Lewis FM, Wojnar D. Life changes in women Infected with HIV by their husbands: An interpretive phenomenological study. *Journal of the Association of Nurses in AIDS Care.* 2015;26(5):580-94.
10. The World Bank. World Bank Country and Lending Groups. USA: The World Bank. Available at:

16. Azhar SV. HIV stigma and gender: a mixed methods study of people living with HIV in Hyderabad, India. 789 East Eisenhower Parkway, USA: ProQuest LLC; 2018.
17. Fauk NK, Hawke K, Mwanri L, Ward PR. Stigma and Discrimination towards People Living with HIV in the Context of Families, Communities, and Healthcare Settings: A Qualitative Study in Indonesia. *International Journal of Environmental Research and Public Health*. 2021;18(5424):1-17.
18. Fauk NK, Ward PR, Hawke K, Mwanri L. HIV Stigma and Discrimination: Perspectives and Personal Experiences of Healthcare Providers in Yogyakarta and Belu, Indonesia. *Frontiers in Medicine*. 2021;8:625.
19. Conserve DF, Eustache E, Oswald CM, Louis E, Scanlan F, Mukherjee JS, et al. Maternal HIV illness and its impact on children's well-being and development in Haiti. *Journal of Child and Family Studies*. 2015;24(9):2779-85.
20. Manopaiboon C, Shaffer N, Clark L, Bhadrakom C, Siriwasin W, Chearskul S, et al. Impact of HIV on families of HIV-infected women who have recently given birth, Bangkok, Thailand. *Journal of Acquired Immune Deficiency Syndromes and Human Retrovirology*. 1998;18(1):54-63.
21. Rodney P, Ceesay KF, Wilson ON. Addressing the Impact of HIV/AIDS on Women and Children in Sub-Saharan Africa: PEPFAR, the U.S. Strategy. *Africa Today*. 2010;57(1):64-76.
22. Mugambi J. The impact of HIV/AIDS on Kenyan rural women and the role of counseling. *International Social Work*. 2006;49(1):87-96.
23. Falleiro PS, Noronha MS. Economic Impact of HIV/AIDS on Women. *Journal of Health Management*. 2012;14(4):495-512.
24. Murphy DA, Austin EL, Greenwell L. Correlates of HIV-Related Stigma Among HIV-Positive Mothers and Their Uninfected Adolescent Children. *Women & Health*. 2007;44(3):19-42.
25. Conserve D, Eustache E, Oswald C, Louis E, King G, Scanlan F, et al. Disclosure and Impact of Maternal HIV+ Serostatus on Mothers and Children in Rural Haiti. *Maternal & Child Health Journal*. 2014;18(10):2309-15.
26. Schardt C, Adams MB, Owens T, Keitz S, Fontelo P. Utilization of the PICO framework to improve searching PubMed for clinical questions. *BMC Med Inform Decis Mak*. 2007;7(1-6).
27. The EndNote Team. EndNote X9. Philadelphia, PA: Clarivate; 2013.
28. Joana Briggs Institute. Critical Appraisal Tools Australia: Joana Briggs Institute; 2017 [Available from: <http://joannabriggs.org/research/critical-appraisal-tools.html>].
29. Thomas J, Harden A. Methods for the thematic synthesis of qualitative research in systematic reviews. *BMC Medical Research Methodology*. 2008;8(45):1-10.
30. Bennetts A, Shaffer N, Manopaiboon C, Chaikyakul P, Siriwasin W, Mock P, et al. Determinants of depression and HIV-related worry among HIV-positive women who have recently given birth, Bangkok, Thailand. *Social science & medicine (1982)*. 1999;49(6):737-49.
31. Dane B. Disclosure: The voices of Thai women living with HIV/AIDS. *International Social Work*. 2002;45(2):185-204.
32. de Souza R. Women living with HIV: Stories of powerlessness and agency. *Women's Studies International Forum*. 2010;33(3):244-52.
33. Mathew RS, Boonsuk P, Dandu M, Sohn AH. Experiences with stigma and discrimination among adolescents and young adults living with HIV in Bangkok, Thailand. *AIDS Care*. 2019;DOI: 10.1080/09540121.2019.1679707.
34. Nguyen TA, Oosterhoff P, Ngoc YP, Wright P, Hardon A. Self-help groups can improve utilization of postnatal care by HIV-infected mothers. *JANAC: Journal of the Association of Nurses in AIDS Care*. 2009;20(2):141-52.
35. Subramanian A, Sarkar S, Roy G, Lakshminarayanan S. Experiences of HIV Positive Mothers From Rural South India during Intra-Natal Period. *Journal of Clinical and Diagnostic Research*. 2013;7(10):2203-6.
36. Brittain K, Mellins CA, Phillips T, Zerbe A, Abrams EJ, Myer L, et al. Social Support, Stigma and Antenatal Depression Among HIV-Infected Pregnant Women in South Africa. *AIDS Behav*. 2017;21:274-82.

37. Withell B. A study of the experiences of women living with HIV/AIDS in Uganda. *International Journal of Palliative Nursing*, 2000, Vol 6, No 5. 2000;6(5):234-44.
38. Yator O, Mathai M, Vander Stoep A, Rao D, Kumar M. Risk factors for postpartum depression in women living with HIV attending prevention of mother-to-child transmission clinic at Kenyatta National Hospital, Nairobi. *AIDS Care*. 2016;28(7):884-9.
39. Bauman LJ, Foster G, Silver EJ, Berman R, Gamble I, Muchaneta L. Children caring for their ill parents with HIV/AIDS. *Vulnerable Children and Youth Studies*. 2006;1(1):56-70.
40. Ruffell S. Stigma kills! The psychological effects of emotional abuse and discrimination towards a patient with HIV in Uganda. *BMJ Case Rep*. 2017;1(1):1-8.
41. Chi BK, Hanh NTT, Rasch V, Gammeltoft T. Induced abortion among HIV-positive women in Northern Vietnam: Exploring reproductive dilemmas. *Culture, Health & Sexuality*. 2010;12(Suppl 1):S41-S54.
42. The United Nations. *The Impact of AIDS*. New York, USA: United Nations Department of Economic and Social Affairs/Population Division; 2004.
43. Sartorius B, VanderHeide JD, Yang M, Goosmann EA, Hon J, Haeuser E, et al. Subnational mapping of HIV incidence and mortality among individuals aged 15–49 years in sub-Saharan Africa, 2000–18: a modelling study. *The Lancet HIV*. 2021;8(6):e363-e75.
44. Earnshaw VA, Chaudoir SR. From Conceptualizing to Measuring HIV Stigma: A Review of HIV Stigma Mechanism Measures. *AIDS and Behavior*. 2009;13(6):1160-77.
45. Harrison A, Short SE, Tuoane-Nkhasi M. Re-focusing the Gender Lens: Caregiving Women, Family Roles and HIV/AIDS Vulnerability in Lesotho. *AIDS Behav*. 2014;18(3):595–604.
46. McGrath JW, Ankrah EM, Schumann DA, Nkumbi S, Lubega M. AIDS and the urban family: Its impact in Kampala, Uganda. *AIDS Care*. 1993;5(1):55-70.
47. Mugweni E, Pearson S, Omar M. Traditional gender roles, forced sex and HIV in Zimbabwean marriages. *Culture, Health & Sexuality*. 2012;14(5):577-90.
48. Patel SN, Wingood GM, Kosambiya JK, McCarty F, Windle M, Yount K, et al. Individual and interpersonal characteristics that influence male-dominated sexual decision-making and inconsistent condom use among married HIV serodiscordant couples in Gujarat, India: results from the positive Jeevan Saathi study. *AIDS Behav*. 2014;18(10):1970-80.
49. Yang Y, Lewis FM, Wojnar D. Culturally Embedded Risk Factors for Cambodian Husband–Wife HIV Transmission: From Women’s Point of View. *Journal of Nursing Scholarship*. 2016;48(2):154-62.
50. Yang Y, Wojnar D, Lewis FM. Becoming a person with HIV: experiences of Cambodian women infected by their spouses. *Culture, Health & Sexuality*. 2016;18(2):198-210.
51. Devi ND. Women Living with HIV/AIDS in Manipur: Relations with Family and Neighbourhood. *Indian Journal of Gender Studies*. 2016;23(2):324-35.
52. Mahaboro DB, Fauk NK, Ward PR, Merry MS, Siri TA, Mwanri L. HIV Stigma and Moral Judgement: Qualitative Exploration of the Experiences of HIV Stigma and Discrimination among Married Men Living with HIV in Yogyakarta. *International Journal of Environmental Research and Public Health*. 2020;17(363):1-15.
53. Fauk NK, Mwakinyali SE, Putra S, Mwanri L. The socio-economic impacts of AIDS on families caring for AIDS-orphaned children in Mbeya rural district, Tanzania. *International Journal of Human Rights in Healthcare*. 2017;10(2):132-45.
54. Guo Y, Li X, Sherr L. The impact of HIV/AIDS on children’s educational outcome: A critical review of global literature. *AIDS Care*. 2012;24:993-1012.
55. Pufall LP, Nyamukapa C, Eaton JW, Campbell C, Skovdal M, Munyati S, et al. The impact of HIV on children’s education in eastern Zimbabwe. *AIDS Care*. 2014;26:1136-43.
56. Elkington KS, Robbins RN, Bauermeister JA, Abrams EJ, McKay M, Mellins CA. Mental Health in Youth Infected with and Affected by HIV: The Role of Caregiver HIV. *J Pediatr Psychol*. 2010;36(3):360–73.

57. Gamarel KE, Kuo CC, Boyes ME, Cluver LD. The dyadic effects of HIV stigma on the mental health of children and their parents in South Africa. *J HIV AIDS Soc Serv.* 2017;16(4):351-66.
58. Fauk NK, Merry MS, Putra S, Sigilipoe MA, Crutzen R, Mwanri L. Perceptions among transgender women of factors associated with the access to HIV/AIDS-related health services in Yogyakarta, Indonesia. *PLoS ONE.* 2019;14(8):1-17.
59. Fauk NK, Merry MS, Siri TA, Tazir FT, Sigilipoe MA, Tarigan KO, et al. Facilitators to Accessibility of HIV/AIDS-Related Health Services among Transgender Women Living with HIV in Yogyakarta, Indonesia. *AIDS Research and Treatment.* 2019;2019:1-10.
60. Deininger K, Crommelynck A, Kempaka G. Impact of AIDS on Family Composition, Welfare, and Investment: Evidence from Uganda. *Rev Dev Econ.* 2005;9:303-24.
61. Mahal A, Canning D, Odumosu K, P. O. Assessing the economic impact of HIV/AIDS on Nigerian households: a propensity score matching approach. *AIDS.* 2008 Suppl 1:S95-101.
62. Zhang X, Zhang Y, Aleong T, Baker T, Fuller-Thomson E. Factors associated with the Household Income of Persons Living with HIV/AIDS in China. *Glob J Health Sci.* 2012;4:108-16.
63. Local Burden of Disease HIV Collaborators. Mapping subnational HIV mortality in six Latin American countries with incomplete vital registration systems. *BMC Medicine.* 2021;19(1):4.
64. Stangl AL, Earnshaw VA, Logie CH, van Brakel W, Simbayi LC, Barré I, et al. The Health Stigma and Discrimination Framework: a global, crosscutting framework to inform research, intervention development, and policy on health-related stigmas. *BMC Medicine.* 2019;17(31):1-13.
65. Mbonu NC, van den Borne B, De Vries NK. Stigma of people with HIV/AIDS in Sub-Saharan Africa: a literature review. *J Trop Med.* 2009;2009:145891.
66. Khawcharoenporn T, Srirach C, Chunloy K. Educational Interventions Improved Knowledge, Attitude, and Practice to Prevent HIV Infection among HIV-Negative Heterosexual Partners of HIV-Infected Persons. *Journal of International Association of Providers of AIDS Care.* 2020;19 1-15.
67. Lalonde B, Uldall KK, J. HG, Panter AT, Zalumas J, Wolfe LR, et al. Impact of HIV/AIDS education on health care provider practice: results from nine grantees of the Special Projects of National Significance Program. *Eval Health Prof.* 2002;25(3):302-20.
68. Li L, Wu S, Wu Z, Sun S, Cui H, Jia M. Understanding Family Support for People Living with HIV/AIDS in Yunnan, China. *AIDS Behav.* 2006;10(5):509-17.
69. Lo Y-R, Chu C, Ananworanich J, Excler J-L, Tucker JD. Stakeholder Engagement in HIV Cure Research: Lessons Learned from Other HIV Interventions and the Way Forward. *AIDS Patient Care and STDS.* 2015;29(7):389-99.
70. Cornu C, International Study Coordinator and Principal Investigator, International HIV/AIDS Alliance, Attawell K, Editor. C. The Involvement of People Living with HIV/AIDS in Community-based Prevention, Care and Support Programs in Developing Countries: A Multi-country Diagnostic Study. UK: International HIV/AIDS Alliance. Available at: <https://www.popcouncil.org/uploads/pdfs/horizons/plha4cntryrprt.pdf>; 2003.
71. Morolake O, Stephens D, Welbourn A. Greater involvement of people living with HIV in health care. *Journal of the International AIDS Society.* 2009;12(4):1-7.
72. Berg RC, Page S, Øgård-Repål A. The effectiveness of peer-support for people living with HIV: A systematic review and meta-analysis. *PLoS ONE.* 2021;16(6):1-24.
73. Mmbaga EJ, Leyna GH, Leshabari MT, Tersbøl B, Lange T, Makyao N, et al. Effectiveness of health care workers and peer engagement in promoting access to health services among population at higher risk for HIV in Tanzania (KPHEALTH): study protocol for a quasi experimental trial. *BMC Health Service Research.* 2019;19(801):1-7.
74. Henderson H, German VF, Panter AT, Huba GJ, Rohweder C, Zalumas J, et al. Systems change resulting from HIV/AIDS education and training. A cross-cutting evaluation of nine innovative projects. *Eval Health Prof.* 1999;22(4):405-26.
75. Brennan A, Browne JP, Horgan M. A systematic review of health service interventions to improve linkage with or retention in HIV care. *AIDS Care.* 2014;26(7):804-12.

76. Chippindale S, French L. HIV counselling and the psychosocial management of patients with HIV or AIDS. *BMJ Case Rep.* 2001;322(7301):1533-5.
77. Schweitzer A-M, Mizwa MB, Ross M. Psychosocial Aspects of HIV/AIDS: Adults. In: Schweitzer A-M, Mizwa MB, Ross M, editors. *HIV Curriculum for the Health Professional*. Texas, USA: Baylor College of Medicine; 2010.
78. Vigliotti V, Taggart T, Walker M, Kusmastuti S, Ransome Y. Religion, faith, and spirituality influences on HIV prevention activities: A scoping review. *PLoS ONE.* 2020;15(6):1-20.
79. Burchardt M. Subjects of counselling: Religion, HIV/AIDS and the management of everyday life in South Africa. In: Becker F, Geissler W, editors. *AIDS and religious practice in Africa*. Netherlands: Brill; 2009. p. 333-58.
80. Stynes R, Lipp J, Minichiello V. HIV and AIDS and "family" counselling: A systems and developmental perspective. *Counselling Psychology Quarterly.* 1996;9(2):131-41.
81. Yu YJ, Li X, Qiao S, Zhou Y. Family Relations in the Context of HIV/AIDS in Southwest China. *AIDS Care.* 2016;28(10):1261-8.
82. Wilson MG, Husbands W, Makoroka L, Rueda S, Greenspan NR, Eady A, et al. Counselling, Case Management and Health Promotion for People Living with HIV/AIDS: An Overview of Systematic Reviews. *AIDS Behav.* 2013;17(5):1612-25.
83. Kennedy CE, Fonner VA, O'Reilly KR, Sweat MD. A systematic review of income generation interventions, including microfinance and vocational skills training, for HIV prevention. *AIDS Care.* 2014;26(6):659-73.
84. Dunbar MS, Maternowska MC, Kang MJ, Laver SM, Mudekunya-Mahaka I, Padian NS. Findings from SHAZI!: a feasibility study of a microcredit and life-skills HIV prevention intervention to reduce risk among adolescent female orphans in Zimbabwe. *Journal of Prevention & Intervention in the Community.* 2010;38(2):147-61.
85. Odek WO, Busza J, Morris CN, Cleland J, Ngugi EN, Ferguson AG. Effects of micro-enterprise services on HIV risk behaviour among female sex workers in Kenya's urban slums. *AIDS Behaviour.* 2009;449-61.
86. Rosenberg MS, Seavey BK, Jules R, Kershaw TS. The role of a microfinance program on HIV risk behavior among Haitian women. *AIDS Behaviour.* 2011;15(5):911-8.
87. Fox MP, Rosen S. A new cascade of HIV care for the era of "treat all". *Plos Med.* 2017;14:4-11.
88. WHO. Consolidated Guidelines on the Use of Antiretroviral Drugs for Treating and Preventing HIV Infection: Recommendation for a Public Health Approach. Geneva, Switzerland: World Health Organization; 2016.
89. BPJS Kesehatan. Peraturan Bersama Sekretaris Jenderal Kementerian Kesehatan Republik Indonesia dan Direktur Utama Badan Penyelenggara Jaminan Sosial Kesehatan. Jakarta: Badan Penyelenggara Jaminan Sosial Kesehatan 2017.
